# Supplementary material for: Isomeric thermally activated delayed fluorescence emitters based on a quinolino[3,2,1-de]acridine-5,9-dione multiple resonance core and carbazole substituent
Source: Royal Society of Chemistry journal article supplement (doi:10.1039/d1qm01588e), 2022-01-01
Supplement: d1qm01588e1.pdf [file d1qm01588e1.pdf]

# Supporting Information

**Isomeric thermally activated delayed fluorescence emitters based on  
quinolino[3,2,1-de]acridine-5,9-dione multiple resonance core and carbazole  
substituent**

*Jing-Feng Liu<sup>#</sup>, Sheng-Nan Zou<sup>#</sup>, Xing Chen, Sheng-Yi Yang, You-Jun Yu, Man-Keung  
Fung\*, Zuo-Quan Jiang\*, and Liang-Sheng Liao*

Institute of Functional Nano & Soft Materials (FUNSOM), Jiangsu Key Laboratory for  
Carbon-Based Functional Materials & Devices, Soochow University, 199 Ren'ai Road,  
Suzhou, 215123, Jiangsu, PR China

E-mail: mkfung@suda.edu.cn; zqjiang@suda.edu.cn.

<sup>#</sup> These authors contributed equally.

# Experimental Section

## 1.1 Materials and instruments

The raw reagents, catalysts and chemicals involved in the initial reaction were all from commercial companies and without further purification. Solvents used in the reaction, such as toluene, tetrahydrofuran, etc. were purified by P solvents purification system.  $^1\text{H}$  NMR and  $^{13}\text{C}$  NMR spectra were recorded on a Bruker 400 spectrometer or Bruker 600 spectrometer at room temperature. Mass spectroscopy was performed using a Thermo Fisher ISQ Single Quadrupole GC-MS with direct probe system. The ultraviolet-visible (UV-vis) absorption spectra were measured by a Shimadzu UV-2600 spectrophotometer. Fluorescent as well as phosphorescent spectra were measured by a Hitachi F-4600 spectrophotometer. Thermogravimetric analysis (TGA) was measured by a METTLER TOLEDO TGA1 under high purity nitrogen atmosphere. The temperature was increased to 800 or 900 °C with a heating rate of 10 °C/minute. DFT and TD-DFT calculations were performed utilizing m062x with the 6-31g(d) atomic basis set. RDG analysis was obtained by Multiwfn (version 3.5) and plotted by VMD (version 1.9.3). Electrochemical analysis was achieved on a CHI 600D electrochemical work station, and the scan rate was 100 mV S<sup>-1</sup> at room temperature. The three-electrode configuration system in *n*-Bu<sub>4</sub>NPF<sub>6</sub> (0.1 M) DMF solution. The redox potential of ferrocene/ferrocenium(Fc/Fc<sup>+</sup>) was measured under room temperature (for calibration). The PLQY was measured using Hamamatsu C9920-02G in nitrogen or air atmosphere. Transient spectra were obtained by using Quantaaurus-

Tau fluorescence lifetime measurement system (C11367-03, Hamamatsu Photonics Co.) in vacuum or nitrogen atmosphere. Elemental analysis was measured using Vario Micro cube.

## 1.2 Single crystal information

The crystal of QAOCz1, QAOCz2, and QAOCz3 was grown by slow evaporation in  $\text{CHCl}_3$  and THF. We use Bruker D8-Venture diffractometer with a Turbo X-ray Source (Mo-K $\alpha$  radiation,  $\lambda = 0.71073 \text{ \AA}$ ) adopting the direct-drive rotating anode technique and a CMOS detector to collect the single-crystal data. The structures were solved by direct methods and refined by the full-matrix least-squares on F<sup>2</sup> using the SHELXTL-2014 program. The X-ray crystallographic coordinates for structure reported in this study have been deposited at the Cambridge Crystallographic Data Centre (CCDC), under deposition number QAOCz1 (2026179), QAOCz2 (2026178), and QAOCz3 (2026181). These data can be obtained free of charge from The Cambridge Crystallographic Data Centre “[http://www.ccdc.cam.ac.uk/data\\_request/cif](http://www.ccdc.cam.ac.uk/data_request/cif)”.

## 1.3 Device fabrication process

OLEDs were fabricated on ITO glass substrates layer (110 nm, 15  $\Omega/\text{square}$ ) under a base pressure of  $3 \times 10^{-6}$  Torr. The active area of each device is 0.09  $\text{cm}^2$ . Deposition rates and thicknesses of all materials were monitored with oscillating quartz crystals. The doping layer was deposited by utilizing two different sensors to monitor the

deposition rates of both host material and dopant material. The deposition rate of the host was controlled at  $0.2 \text{ nm s}^{-1}$ , and the deposition rate of the dopant was adjusted according to the volume ratio doped in the host materials. The electroluminescence (EL) and current density-voltage (J-V) characteristics of the devices were measured by a constant current source (Keithley 2400 SourceMeter) combined with a photometer (Photo Research SpectraScan PR655).

## 1.4 Syntheses of Materials

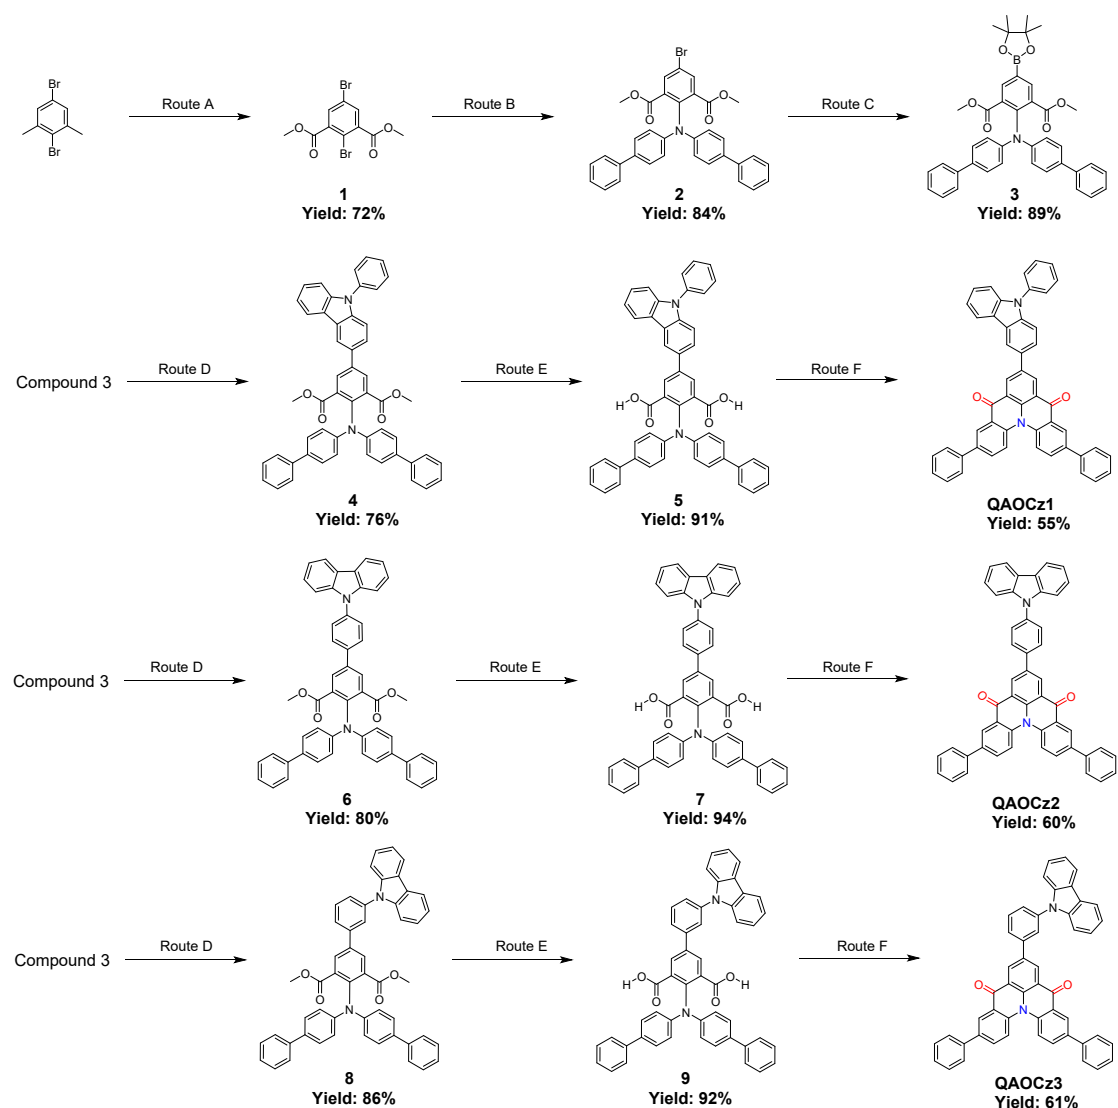

**Scheme S1.** Route A: Synthesis of 1: (i)  $\text{KMnO}_4$  (2.2 equiv.), *t*-BuOH,  $\text{H}_2\text{O}$ , reflux, 24 h. (ii) MeOH,  $\text{H}_2\text{SO}_4$ , reflux. Route B: Synthesis of 2: di([1,1'-biphenyl]-4-yl)amine (1 equiv.), Cu

(0.1 equiv.), Cu (0.1 equiv.), 2,2,6,6-tetramethylheptane-3,5-dione (0.1 equiv.), potassium carbonate (1.5 equiv.), 1-butoxybutane, reflux, 48 h. Route C: Synthesis of 3: Bpin<sub>2</sub> (1.4 equiv.), Pd(dppf)Cl<sub>2</sub> (0.05 equiv.), potassium acetate (1.4 equiv.), 1,4-dioxane, reflux, 12 h. Route D: Synthesis of 4, 6 and 8: 3-bromo-9-phenyl-9H-carbazole/9-(4-bromophenyl)-9H-carbazole/9-(3-bromophenyl)-9H-carbazole (1.2 equiv.), tetrakis(triphenylphosphine)palladium (0.05 equiv.), potassium carbonate (4 equiv.), 1,4-dioxane, 100 °C, 10 h. Route E: Synthesis of 5, 7 and 9: sodium hydroxide (5 equiv.), THF/water = 1:1, reflux, 48 h. Route F: Synthesis of QAOCz1/QAOCz2/QAOCz3: oxalyl chloride Tin(IV) (2.2 equiv.), oxalyl chloride (2.2 equiv.), DMF, DCM, reflux, 4h.

**dimethyl 5-bromo-2-(di([1,1'-biphenyl]-4-yl)amino)isophthalate (2).** Compound dimethyl 2,5-dibromoisophthalate (**1**) (7.04 g, 20 mmol), di([1,1'-biphenyl]-4-yl)amine (6.43 g, 20 mmol), potassium carbonate (4.15 g, 30 mmol), copper(I) iodide (0.38 g, 2 mmol), 2,2,6,6-tetramethylheptane-3,5-dione (0.37 g, 2 mmol) and activated copper powder (0.13 g, 2 mmol) were combined with 150 mL 1-butoxybutane in a roundbottom flask equipped with a reflux condenser and magnetic stir bar. The reaction mixture was heated to 142 °C for 48 h under argon. After cooled to room temperature, the reaction was filtered, the solvent removed under vacuum condition, and then the residue purified by column chromatography on silica gel using petroleum ether/dichloromethane (1/1, v/v) as eluent, yellow solid was finally obtained. Yield: 9.95 g (84%). <sup>1</sup>H NMR (400 MHz, Chloroform-d) δ 7.92 (s, 2H), 7.58 – 7.54 (m, 4H), 7.49 – 7.45 (m, 4H), 7.41 (t, *J* = 7.7 Hz, 4H), 7.33 – 7.28 (m, 2H), 7.09 – 7.04 (m, 4H), 3.49 (s, 6H). <sup>13</sup>C NMR (101 MHz, CDCl<sub>3</sub>) δ 165.90, 145.86, 143.19, 140.50, 136.61, 135.30, 134.19, 128.77, 127.48, 126.91, 126.63, 122.67, 118.31, 52.52. MS (EI) *m/z*: 591.228 [M<sup>+</sup>]. Calcd for C<sub>34</sub>H<sub>26</sub>BrNO<sub>4</sub>: 591.10. Elemental analysis (calculated, found for C<sub>34</sub>H<sub>26</sub>BrNO<sub>4</sub>): C (68.93%, 68.84%), H (4.42%, 4.50%), N (2.36%, 2.33%).

**dimethyl 2-(di([1,1'-biphenyl]-4-yl)amino)-5-(4,4,5,5-tetramethyl-1,3,2-dioxaborolan-2-yl)isophthalate (3).** Compound dimethyl 5-bromo-2-(di([1,1'-biphenyl]-4-yl)amino)isophthalate (**2**) (8.89 g, 15 mmol), 4,4,4',4',5,5,5'-octamethyl-2,2'-bi(1,3,2-dioxaborolane) (5.33 g, 21.00 mmol), Pd(dppf)Cl<sub>2</sub> (612 mg, 0.75 mmol) and potassium acetate (5.89 g, 60 mmol) were combined with 100 mL 1,4-dioxane in a roundbottom flask equipped with a reflux condenser and magnetic stir bar. The reaction mixture was heated to 100 °C for 12 h under argon. After cooled to room temperature, the reaction was filtered, the solvent removed under vacuum condition, and then the residue purified by column chromatography on silica gel using petroleum ether/dichloromethane (3/2, v/v) as eluent, yellow solid was finally obtained. Yield: 8.54 g (89%). <sup>1</sup>H NMR (400 MHz, Chloroform-d) δ 8.21 (s, 2H), 7.60 – 7.53 (m, 4H), 7.49 – 7.37 (m, 8H), 7.31 (d, *J* = 7.4 Hz, 2H), 7.12 – 7.04 (m, 4H), 3.47 (s, 6H), 1.35 (s, 12H). <sup>13</sup>C NMR (101 MHz, CDCl<sub>3</sub>) δ 167.38, 146.37, 146.06, 140.59, 139.94, 135.16, 131.71, 128.73, 127.39, 126.82, 126.62, 122.92, 84.38, 52.19, 24.87. MS (EI) *m/z*: 361.12 [M<sup>+</sup>]. Calcd for C<sub>34</sub>H<sub>26</sub>BrNO<sub>4</sub>: 591.10. MS (EI) *m/z*: 591.003 [M<sup>+</sup>]. Calcd for C<sub>40</sub>H<sub>38</sub>BNO<sub>6</sub>: 639.28. Elemental analysis (calculated, found for C<sub>40</sub>H<sub>38</sub>BNO<sub>6</sub>): C (75.12%, 75.30%), H (5.99%, 6.04%), N (2.19%, 2.25%).

**dimethyl 2-(di([1,1'-biphenyl]-4-yl)amino)-5-(9-phenyl-9H-carbazol-3-yl)isophthalate (4).** Compound dimethyl 2-(di([1,1'-biphenyl]-4-yl)amino)-5-(4,4,5,5-tetramethyl-1,3,2-dioxaborolan-

2-yl)isophthalate (**3**) (2.24 g, 3.50 mmol), 3-bromo-9-phenyl-9H-carbazole (1.35 g, 4.20 mmol), tetrakis(triphenylphosphine)palladium (0.20 g, 0.18 mmol) and potassium carbonate (1.93 g, 14.00 mmol) were combined with 50 mL 1,4-dioxane in a roundbottom flask equipped with a reflux condenser and magnetic stir bar. The reaction mixture was heated to 100 °C for 10 h under argon. After cooled to room temperature, the reaction was filtered, the solvent removed under vacuum condition, and then the residue purified by column chromatography on silica gel using petroleum ether/dichloromethane (3/2, v/v) as eluent, yellow solid was finally obtained. Yield: 2.01 g (76%). <sup>1</sup>H NMR (400 MHz, Chloroform-d) δ 8.49 – 8.42 (m, 1H), 8.23 (dt, *J* = 7.8, 1.0 Hz, 1H), 8.21 (s, 2H), 7.73 (dd, *J* = 8.6, 1.9 Hz, 1H), 7.71 – 7.57 (m, 8H), 7.57 – 7.49 (m, 6H), 7.50 – 7.41 (m, 6H), 7.39 – 7.31 (m, 3H), 7.25 – 7.15 (m, 4H), 3.59 (s, 6H). <sup>13</sup>C NMR (101 MHz, Chloroform-d) δ 167.62, 146.25, 142.25, 141.47, 140.78, 140.64, 139.43, 137.47, 134.86, 132.94, 132.27, 130.56, 130.01, 128.77, 127.72, 127.44, 127.11, 126.81, 126.63, 126.43, 125.03, 124.09, 123.32, 122.56, 120.47, 120.36, 118.83, 110.34, 110.07, 52.45. MS (EI) *m/z*: 754.324 [M<sup>+</sup>]. Calcd for C<sub>52</sub>H<sub>38</sub>N<sub>2</sub>O<sub>4</sub>: 754.28. Elemental analysis (calculated, found for C<sub>52</sub>H<sub>38</sub>N<sub>2</sub>O<sub>4</sub>): C (82.74%, 82.83%), H (5.07%, 4.99%), N (3.71%, 3.77%).

**2-(di([1,1'-biphenyl]-4-yl)amino)-5-(9-phenyl-9H-carbazol-3-yl)isophthalic acid (5).** Compound **4** (1.89 g, 2.50 mmol) and sodium hydroxide (0.50 g, 12.50 mmol) in a solution of 1:1 THF/water (100 mL) heated to reflux for 48 h. Acidification with concentrated hydrochloric acid precipitated the triarylamine diacid, which was collected by vacuum filtration and oven-dried (80 °C) overnight, then employed directly without further purification. Yield: 1.65 g (91.0%).

**3,11-diphenyl-7-(9-phenyl-9H-carbazol-3-yl)quinolino[3,2,1-de]acridine-5,9-dione (QAOCz1).** Compound **5** (1.60 g, 2.20 mmol) was dispersed in dry dichloromethane (20 mL) in a three-neck round-bottom flask equipped with a magnetic stir bar and reflux condenser with a drying tube. Two drops of *N,N*-dimethylformamide was added followed by oxalyl chloride (0.41 mL, 4.84 mmol). The reaction was heated to reflux for 0.5 h. Tin(IV) chloride (2.0 mL, 4.84 mmol) was added and the reaction refluxed for an additional 3 h. The reaction mixture was added dropwise to an aqueous solution of sodium hydroxide (≈ 1 M) and extracted with dichloromethane. The organic layer dried over sodium sulfate and concentrated. The crude product was then purified by flash chromatography using DCM/petroleum ether (3/1, v/v) as the eluent to give a bright yellow-green solid. Yield: 0.93 g (61.0%). This compound was further purified by sublimation before used in device fabrication. <sup>1</sup>H NMR (400 MHz, Chloroform-d) δ 9.18 (s, 2H), 8.81 (d, *J* = 2.3 Hz, 2H), 8.63 (d, *J* = 1.8 Hz, 1H), 8.31 (t, *J* = 8.3 Hz, 3H), 8.12 (d, *J* = 6.9 Hz, 1H), 8.01 (dd, *J* = 8.8, 2.4 Hz, 2H), 7.92 (dd, *J* = 8.5, 1.9 Hz, 1H), 7.87 – 7.73 (m, 4H), 7.73 – 7.59 (m, 4H), 7.59 – 7.44 (m, 9H), 7.38 (ddd, *J* = 8.0, 5.6, 2.5 Hz, 1H). <sup>13</sup>C NMR (101 MHz, CDCl<sub>3</sub>) δ 180.93, 139.49, 138.65, 137.96, 137.65, 136.96, 133.46, 133.43, 133.00, 132.66, 129.25, 128.87, 128.78, 128.62, 126.90, 125.63, 125.52, 122.81, 121.32, 116.45, 116.23. MS (EI) *m/z*: 690.304 [M<sup>+</sup>]. Calcd for C<sub>50</sub>H<sub>30</sub>N<sub>2</sub>O<sub>2</sub>: 690.23. Elemental analysis (calculated, found for C<sub>50</sub>H<sub>30</sub>N<sub>2</sub>O<sub>2</sub>): C (86.94%, 86.86%), H (4.38%, 4.29%), N (4.06%, 4.12%).

**dimethyl 4'-(9H-carbazol-9-yl)-4-(di([1,1'-biphenyl]-4-yl)amino)-[1,1'-biphenyl]-3,5-dicarboxylate (6).** Compound dimethyl 2-(di([1,1'-biphenyl]-4-yl)amino)-5-(4,4,5,5-tetramethyl-

1,3,2-dioxaborolan-2-yl)isophthalate (**3**) (2.24 g, 3.50 mmol), 9-(4-bromophenyl)-9H-carbazole (1.35 g, 4.20 mmol), tetrakis(triphenylphosphine)palladium (0.20 g, 0.18 mmol) and potassium carbonate (1.93 g, 14.00 mmol) were combined with 50 mL 1,4-dioxane in a roundbottom flask equipped with a reflux condenser and magnetic stir bar. The reaction mixture was heated to 100 °C for 10 h under argon. After cooled to room temperature, the reaction was filtered, the solvent removed under vacuum condition, and then the residue purified by column chromatography on silica gel using petroleum ether/dichloromethane (3/2, v/v) as eluent, yellow solid was finally obtained. Yield: 2.11 g (80%). <sup>1</sup>H NMR (400 MHz, Chloroform-d) δ 8.20 (dt, *J* = 7.7, 1.0 Hz, 2H), 8.18 (s, 2H), 7.94 – 7.89 (m, 2H), 7.76 – 7.70 (m, 2H), 7.65 – 7.60 (m, 4H), 7.57 – 7.44 (m, 12H), 7.35 (ddt, *J* = 8.1, 6.7, 1.3 Hz, 4H), 7.23 – 7.17 (m, 4H), 3.59 (s, 6H). <sup>13</sup>C NMR (101 MHz, Chloroform-d) δ 167.30, 146.16, 143.40, 140.73, 140.58, 137.74, 137.48, 137.42, 135.14, 133.09, 132.25, 128.79, 128.36, 127.55, 127.50, 126.89, 126.65, 126.07, 123.56, 122.72, 109.78, 52.48. MS (EI) *m/z*: 754.335 [M<sup>+</sup>]. Calcd for C<sub>52</sub>H<sub>38</sub>N<sub>2</sub>O<sub>4</sub>: 754.28. Elemental analysis (calculated, found for C<sub>52</sub>H<sub>38</sub>N<sub>2</sub>O<sub>4</sub>): C (82.74%, 82.83%), H (5.07%, 5.14%), N (3.71%, 3.83%).

**4'-(9H-carbazol-9-yl)-4-(di([1,1'-biphenyl]-4-yl)amino)-[1,1'-biphenyl]-3,5-dicarboxylic acid (7)**. Compound **6** (2.11 g, 2.80 mmol) and sodium hydroxide (0.56 g, 14.00 mmol) in a solution of 1:1 THF/water (100 mL) heated to reflux for 48 h. Acidification with concentrated hydrochloric acid precipitated the triarylamine diacid, which was collected by vacuum filtration and oven-dried (80 °C) overnight, then employed directly without further purification. Yield: 1.91 g (94.0%).

**7-(4-(9H-carbazol-9-yl)phenyl)-3,11-diphenylquinolino[3,2,1-de]acridine-5,9-dione (QAOCz2)**. Compound **7** (1.89 g, 2.60 mmol) was dispersed in dry dichloromethane (20 mL) in a three-neck round-bottom flask equipped with a magnetic stir bar and reflux condenser with a drying tube. Two drops of N, N-dimethylformamide was added followed by oxalyl chloride (0.35 mL, 5.72 mmol). The reaction was heated to reflux for 0.5 h. Tin(IV) chloride (1.69 mL, 5.72 mmol) was added and the reaction refluxed for an additional 3 h. The reaction mixture was added dropwise to an aqueous solution of sodium hydroxide (≈ 1 M) and extracted with dichloromethane. The organic layer dried over sodium sulfate and concentrated. The crude product was then purified by flash chromatography using DCM/petroleum ether (3/1, v/v) as the eluent to give a bright yellow-green solid. Yield: 0.99 g (55.0%). This compound was further purified by sublimation before used in device fabrication. <sup>1</sup>H NMR (400 MHz, Chloroform-d) δ 9.13 (s, 2H), 8.79 (d, *J* = 2.3 Hz, 2H), 8.29 (d, *J* = 8.8 Hz, 2H), 8.17 (d, *J* = 7.7 Hz, 2H), 8.11 – 8.05 (m, 2H), 8.00 (dd, *J* = 8.9, 2.4 Hz, 2H), 7.86 – 7.69 (m, 6H), 7.63 – 7.39 (m, 10H), 7.36 – 7.30 (m, 2H). <sup>13</sup>C NMR (101 MHz, CDCl<sub>3</sub>) δ 140.86, 140.80, 139.91, 139.07, 138.75, 138.40, 138.18, 137.29, 136.56, 133.38, 133.20, 129.03, 128.94, 127.94, 127.91, 127.87, 127.34, 126.38, 126.27, 125.96, 125.22, 123.90, 121.79, 120.50, 110.13. MS (EI) *m/z*: 690.298 [M<sup>+</sup>]. Calcd for C<sub>50</sub>H<sub>30</sub>N<sub>2</sub>O<sub>2</sub>: 690.23. Elemental analysis (calculated, found for C<sub>50</sub>H<sub>30</sub>N<sub>2</sub>O<sub>2</sub>): C (86.94%, 86.45%), H (4.38%, 4.56%), N (4.06%, 4.09%).

**dimethyl 3'-(9H-carbazol-9-yl)-4-(di([1,1'-biphenyl]-4-yl)amino)-[1,1'-biphenyl]-3,5-dicarboxylate (8)**. Compound dimethyl 2-(di([1,1'-biphenyl]-4-yl)amino)-5-(4,4,5,5-tetramethyl-1,3,2-dioxaborolan-2-yl)isophthalate (**3**) (2.24 g, 3.50 mmol), 9-(3-bromophenyl)-9H-carbazole (1.35 g, 4.20 mmol), tetrakis(triphenylphosphine)palladium (0.20 g, 0.18 mmol) and potassium carbonate (1.93 g, 14.00 mmol) were combined with 50 mL 1,4-dioxane in a roundbottom flask

equipped with a reflux condenser and magnetic stir bar. The reaction mixture was heated to 100 °C for 10 h under argon. After cooled to room temperature, the reaction was filtered, the solvent removed under vacuum condition, and then the residue purified by column chromatography on silica gel using petroleum ether/dichloromethane (3/2, v/v) as eluent, yellow solid was finally obtained. Yield: 2.27 g (86%). <sup>1</sup>H NMR (400 MHz, Chloroform-d) δ 8.16 (dt, *J* = 7.9, 1.1 Hz, 2H), 8.07 (s, 2H), 7.79 – 7.68 (m, 2H), 7.63 – 7.59 (m, 1H), 7.59 – 7.55 (m, 4H), 7.51 – 7.47 (m, 4H), 7.46 – 7.39 (m, 8H), 7.34 – 7.28 (m, 4H), 7.15 – 7.11 (m, 4H), 3.51 (s, 6H). <sup>13</sup>C NMR (101 MHz, Chloroform-d) δ 167.15, 146.08, 143.57, 140.86, 140.55, 140.47, 138.60, 137.18, 135.14, 133.08, 132.17, 130.65, 128.76, 127.46, 126.86, 126.82, 126.62, 126.08, 125.92, 125.56, 123.47, 122.73, 120.40, 120.11, 109.71, 52.42. MS (EI) *m/z*: 754.335 [M<sup>+</sup>]. Calcd for C<sub>52</sub>H<sub>38</sub>N<sub>2</sub>O<sub>4</sub>: 754.28. Elemental analysis (calculated, found for C<sub>52</sub>H<sub>38</sub>N<sub>2</sub>O<sub>4</sub>): C (82.74%, 82.83%), H (5.07%, 5.16%), N (3.71%, 3.68%).

**3'-(9H-carbazol-9-yl)-4-(di([1,1'-biphenyl]-4-yl)amino)-[1,1'-biphenyl]-3,5-dicarboxylic acid (9).** Compound **6** (2.36 g, 3.00 mmol) and sodium hydroxide (0.60 g, 15.00 mmol) in a solution of 1:1 THF/water (100 mL) heated to reflux for 48 h. Acidification with concentrated hydrochloric acid precipitated the triarylamine diacid, which was collected by vacuum filtration and oven-dried (80 °C) overnight, then employed directly without further purification. Yield: 2.01 g (92.0%).

**7-(3-(9H-carbazol-9-yl)phenyl)-3,11-diphenylquinolino[3,2,1-de]acridine-5,9-dione (QAOCz3).** Compound **9** (1.96 g, 2.70 mmol) was dispersed in dry dichloromethane (20 mL) in a three-neck round-bottom flask equipped with a magnetic stir bar and reflux condenser with a drying tube. Two drops of N, N-dimethylformamide was added followed by oxalyl chloride (0.51 mL, 5.94 mmol). The reaction was heated to reflux for 0.5 h. Tin(IV) chloride (0.68 mL, 5.94 mmol) was added and the reaction refluxed for an additional 3 h. The reaction mixture was added dropwise to an aqueous solution of sodium hydroxide (≈ 1 M) and extracted with dichloromethane. The organic layer dried over sodium sulfate and concentrated. The crude product was then purified by flash chromatography using DCM/petroleum ether (3/1, v/v) as the eluent to give a bright yellow-green solid. Yield: 1.08 g (58.0%). This compound was further purified by sublimation before used in device fabrication. <sup>1</sup>H NMR (400 MHz, Chloroform-d) δ 9.02 (s, 2H), 8.72 (d, *J* = 2.3 Hz, 2H), 8.23 (d, *J* = 8.8 Hz, 2H), 8.16 (dt, *J* = 7.6, 1.0 Hz, 2H), 8.00 – 7.93 (m, 3H), 7.92 – 7.88 (m, 1H), 7.76 (d, *J* = 7.8 Hz, 1H), 7.75 – 7.70 (m, 4H), 7.63 (ddd, *J* = 7.9, 2.0, 1.0 Hz, 1H), 7.53 – 7.47 (m, 6H), 7.46 – 7.39 (m, 4H), 7.30 (ddd, *J* = 7.9, 6.9, 1.2 Hz, 2H). <sup>13</sup>C NMR (101 MHz, CDCl<sub>3</sub>) δ 181.01, 140.74, 139.60, 139.45, 138.93, 138.74, 137.97, 133.05, 133.00, 130.94, 129.25, 129.20, 128.61, 128.58, 126.91, 126.87, 126.12, 125.81, 125.59, 125.47, 123.46, 122.88, 121.39, 120.12. MS (EI) *m/z*: 690.322 [M<sup>+</sup>]. Calcd for C<sub>50</sub>H<sub>30</sub>N<sub>2</sub>O<sub>2</sub>: 690.23. Elemental analysis (calculated, found for C<sub>50</sub>H<sub>30</sub>N<sub>2</sub>O<sub>2</sub>): C (86.94%, 87.05%), H (4.38%, 4.43%), N (4.06%, 3.98%).



## 2 Supplemental Figures

### 2.1 Experimental data of synthesis

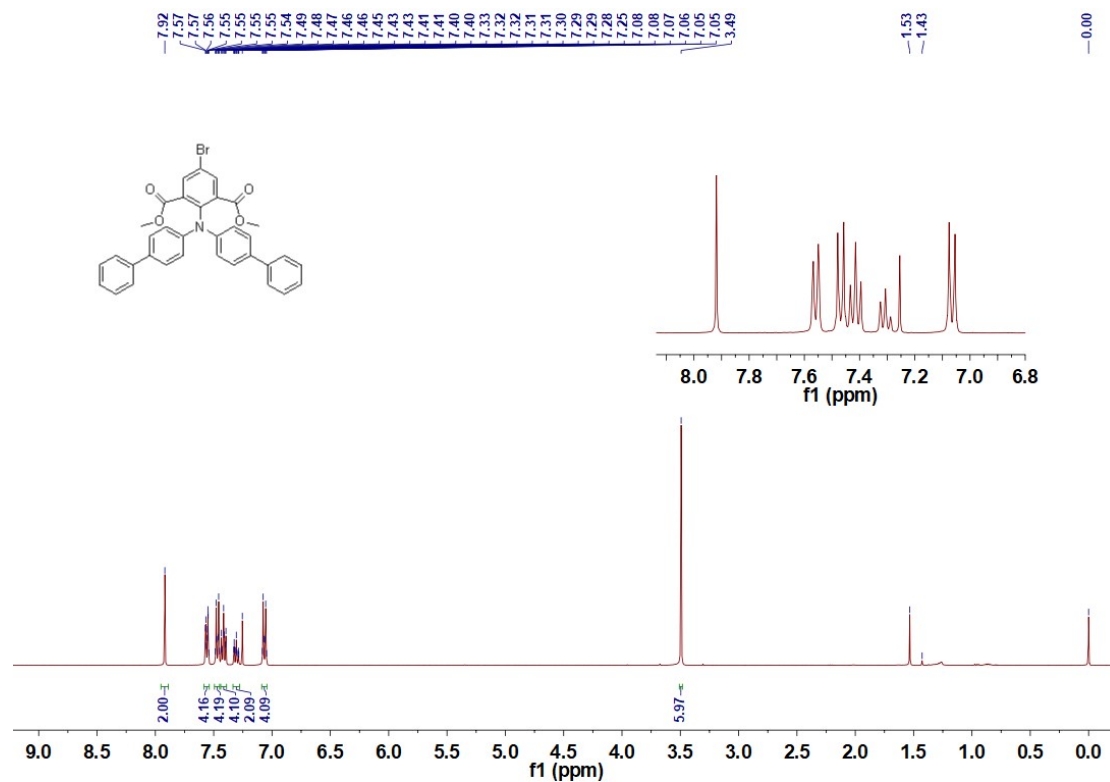

**Figure S1.** <sup>1</sup>H NMR spectrum of dimethyl 5-bromo-2-(di([1,1'-biphenyl]-4-yl)amino)isophthalate (2).

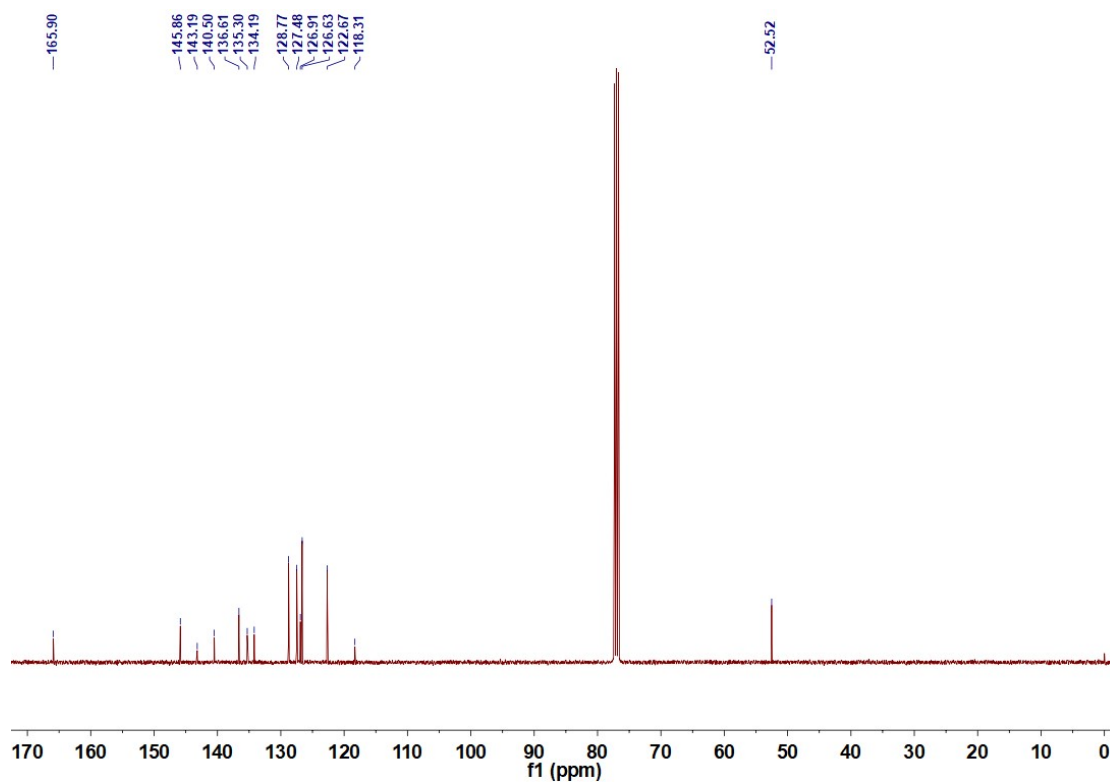

**Figure S2.**  $^{13}\text{C}$  NMR spectrum of dimethyl 5-bromo-2-(di([1,1'-biphenyl]-4-yl)amino)isophthalate (2).

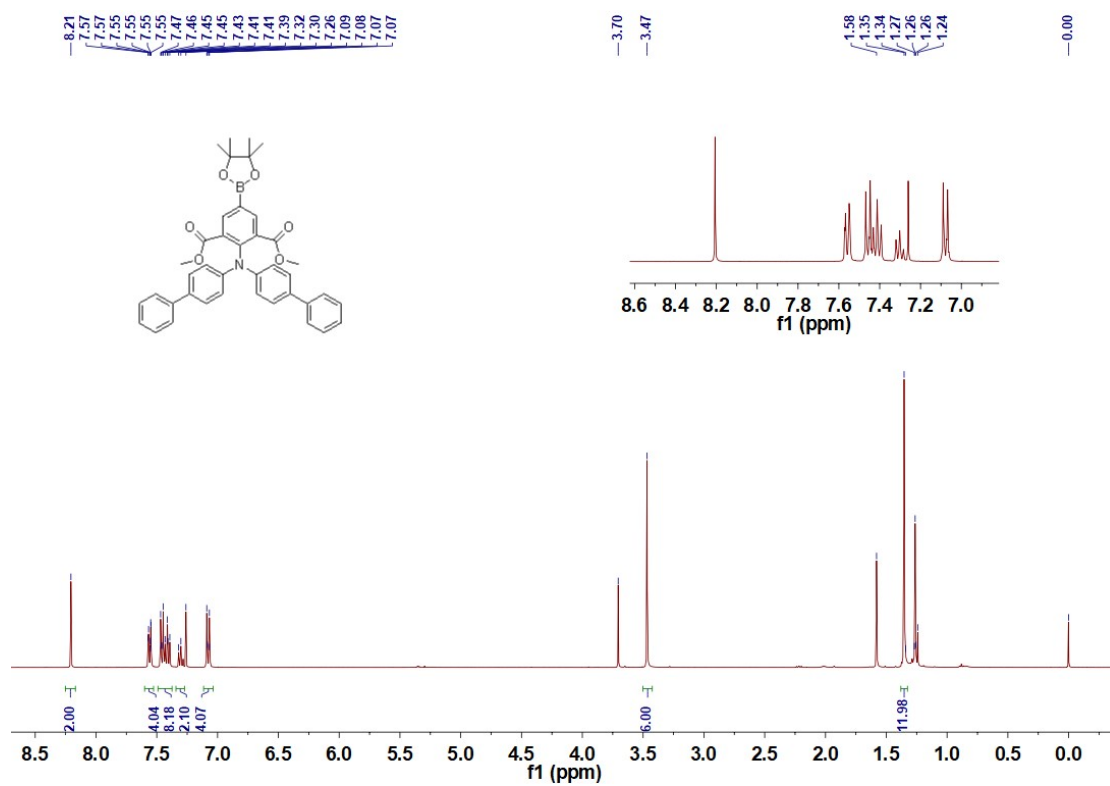

**Figure S3.**  $^1\text{H}$  NMR spectrum of dimethyl 2-(di([1,1'-biphenyl]-4-yl)amino)-5-(4,4,5,5-tetramethyl-1,3,2-dioxaborolan-2-yl)isophthalate (3).

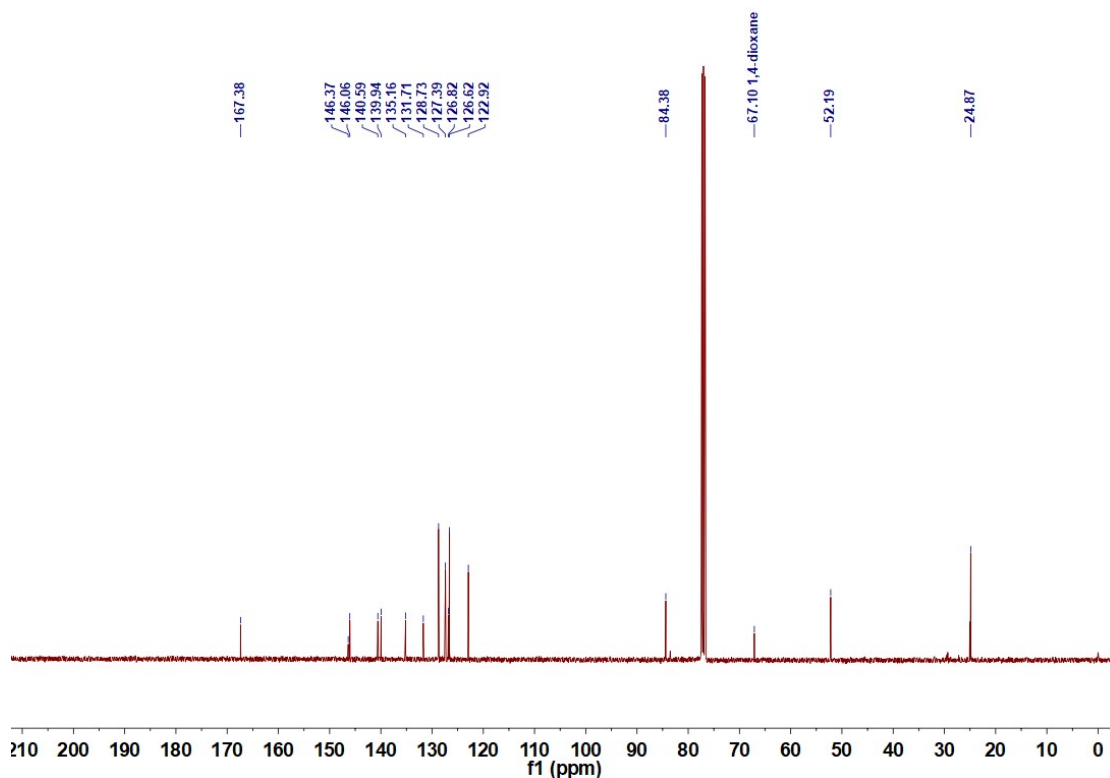

**Figure S4.**  $^{13}\text{C}$  NMR spectrum of dimethyl 2-(di([1,1'-biphenyl]-4-yl)amino)-5-(4,4,5,5-tetramethyl-1,3,2-dioxaborolan-2-yl)isophthalate (3).

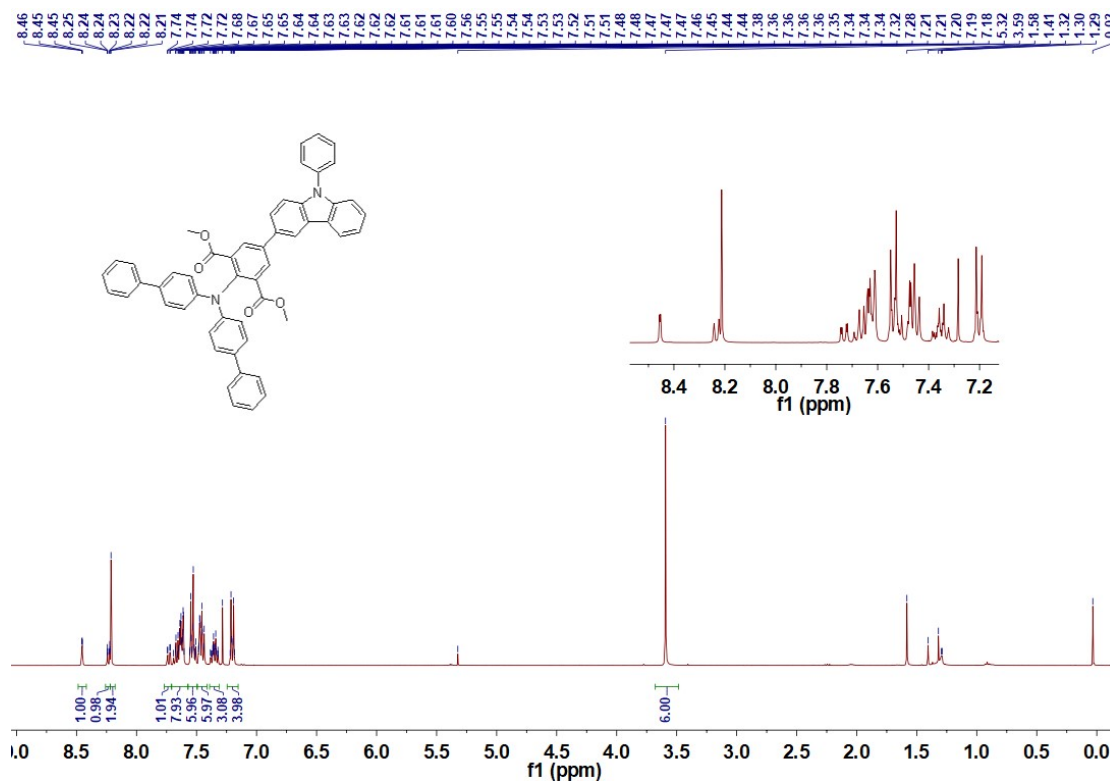

**Figure S5.**  $^1\text{H}$  NMR spectrum of dimethyl 2-(di([1,1'-biphenyl]-4-yl)amino)-5-(9-phenyl-9H-carbazol-3-yl)isophthalate (4).

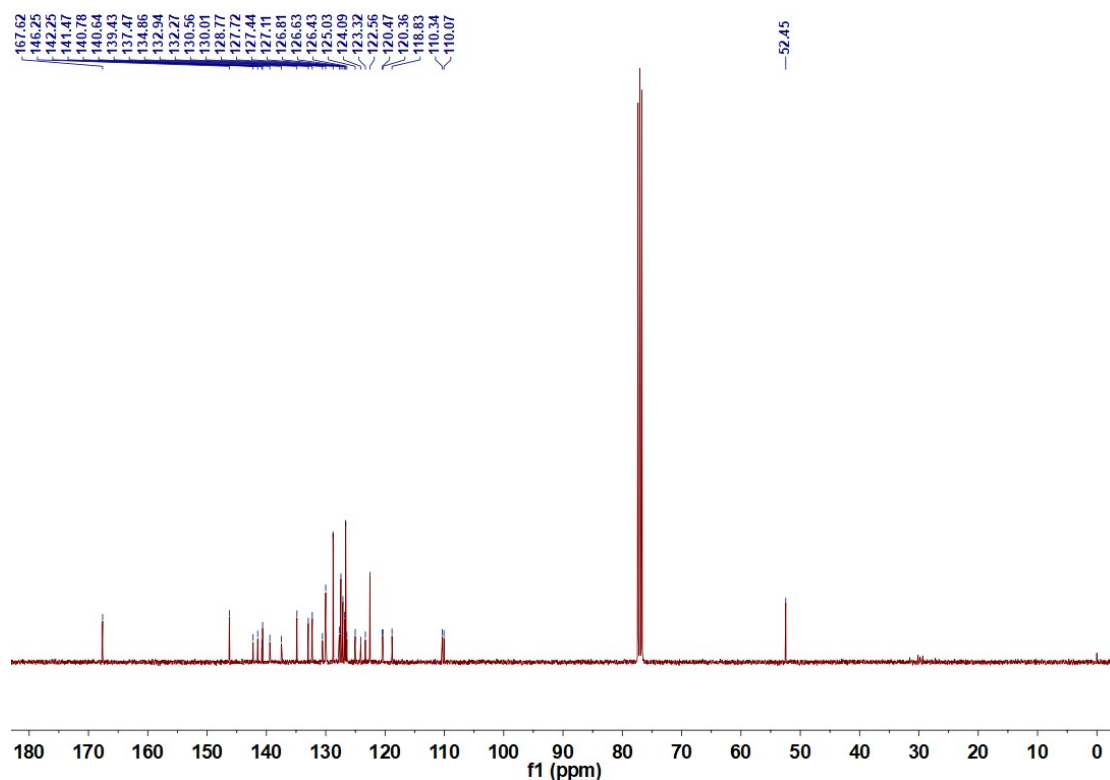

**Figure S6.**  $^{13}\text{C}$  NMR spectrum of dimethyl 2-(di([1,1'-biphenyl]-4-yl)amino)-5-(9-phenyl-9H-carbazol-3-yl)isophthalate (4).

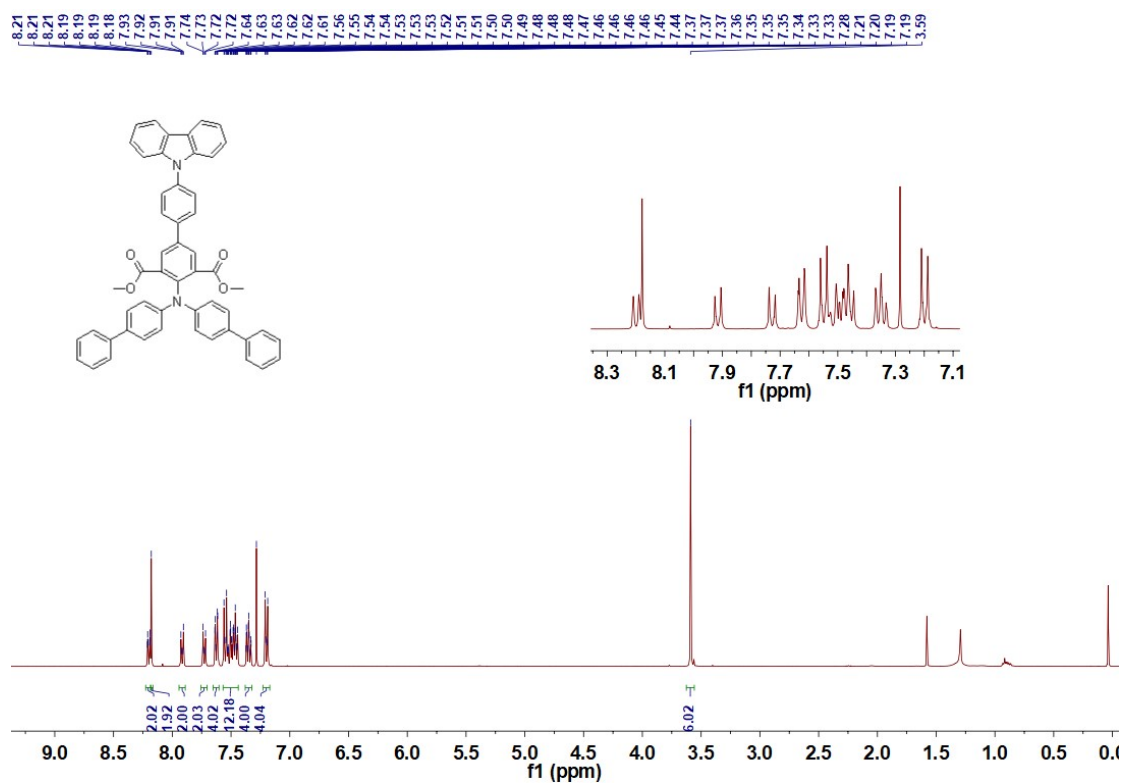

**Figure S7.**  $^1\text{H}$  NMR spectrum of dimethyl 4'-(9H-carbazol-9-yl)-4-(di([1,1'-biphenyl]-4-yl)amino)-[1,1'-biphenyl]-3,5-dicarboxylate (6).

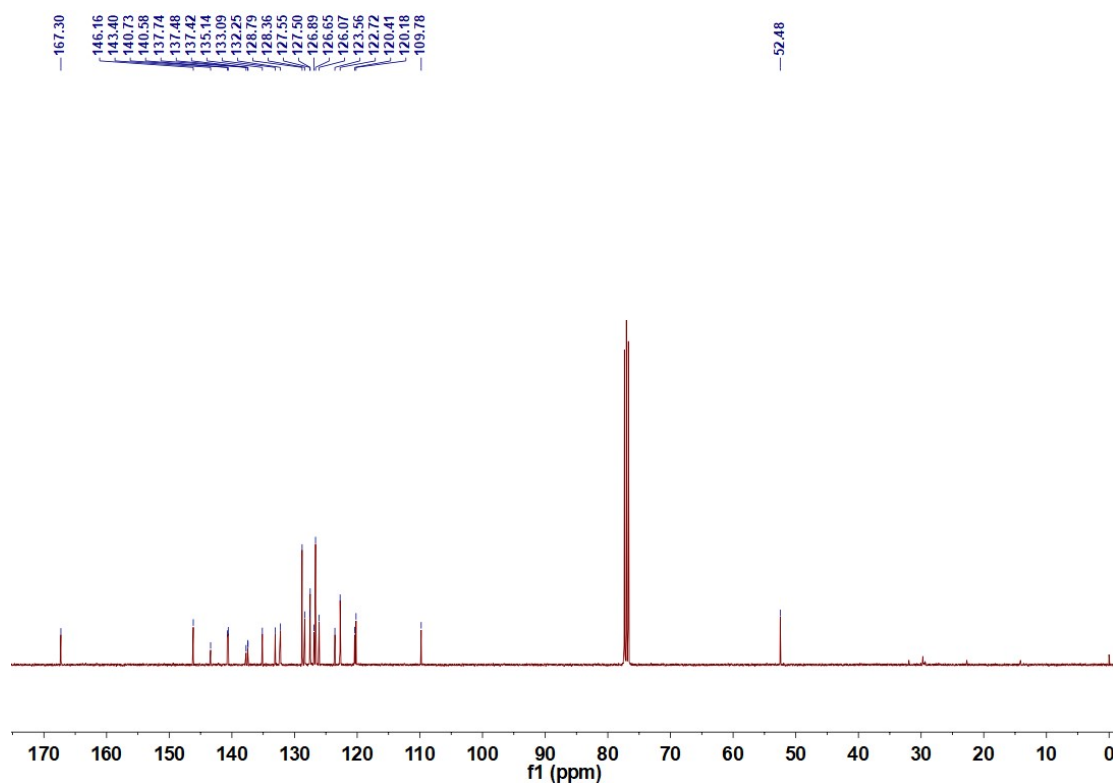

**Figure S8.**  $^{13}\text{C}$  NMR spectrum of dimethyl 4'-(9H-carbazol-9-yl)-4-(di([1,1'-biphenyl]-4-yl)amino)-[1,1'-biphenyl]-3,5-dicarboxylate (6).

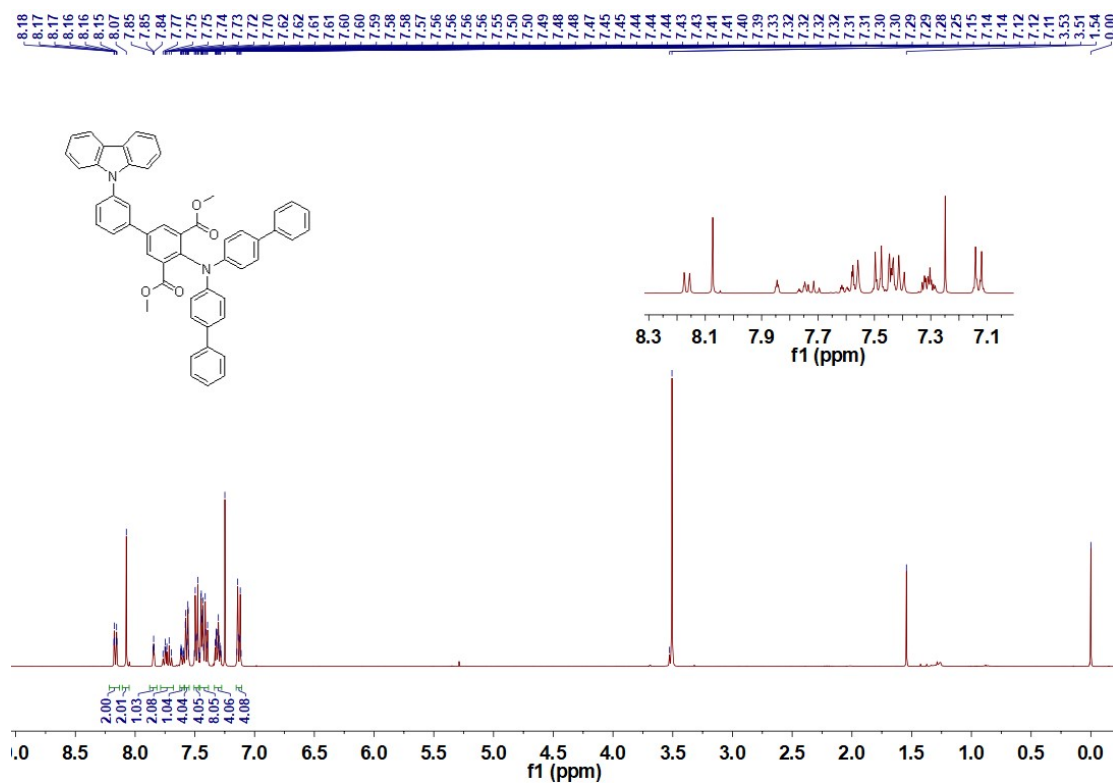

**Figure S9.**  $^1\text{H}$  NMR spectrum of dimethyl 3'-(9H-carbazol-9-yl)-4-(di([1,1'-biphenyl]-4-yl)amino)-[1,1'-biphenyl]-3,5-dicarboxylate (8).

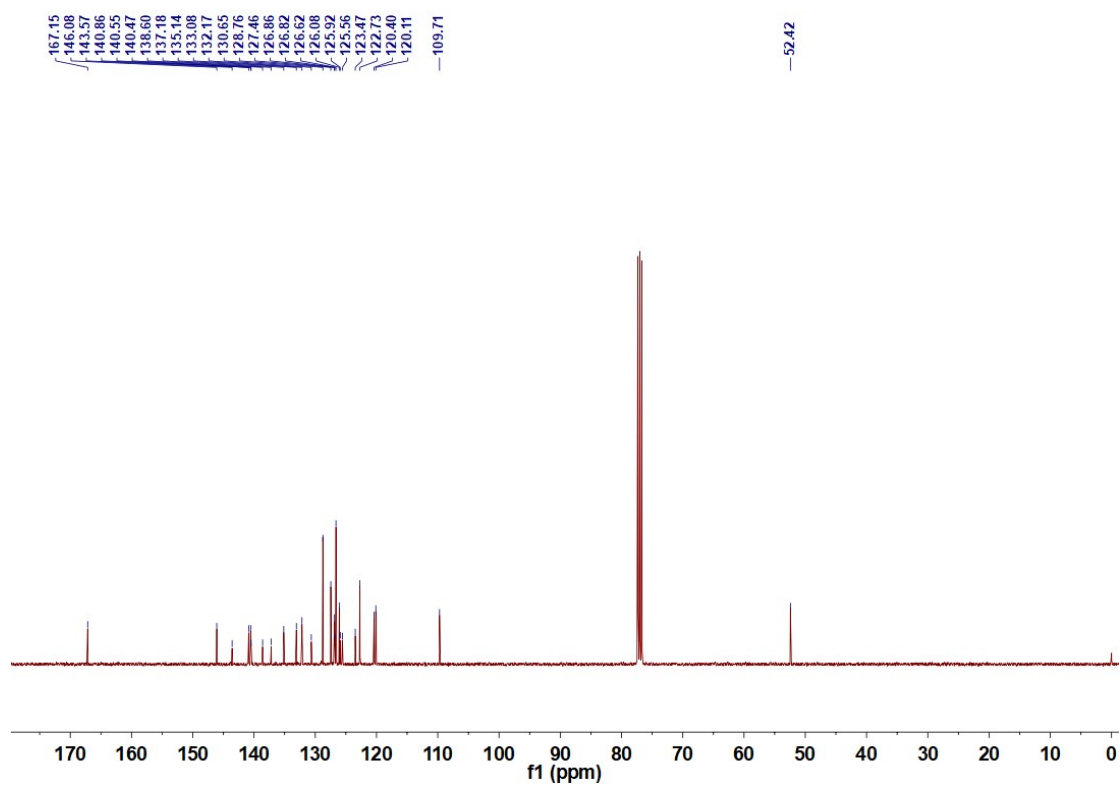

**Figure S10.**  $^{13}\text{C}$  NMR spectrum of dimethyl 3'-(9H-carbazol-9-yl)-4-(di([1,1'-biphenyl]-4-yl)amino)-[1,1'-biphenyl]-3,5-dicarboxylate (8).

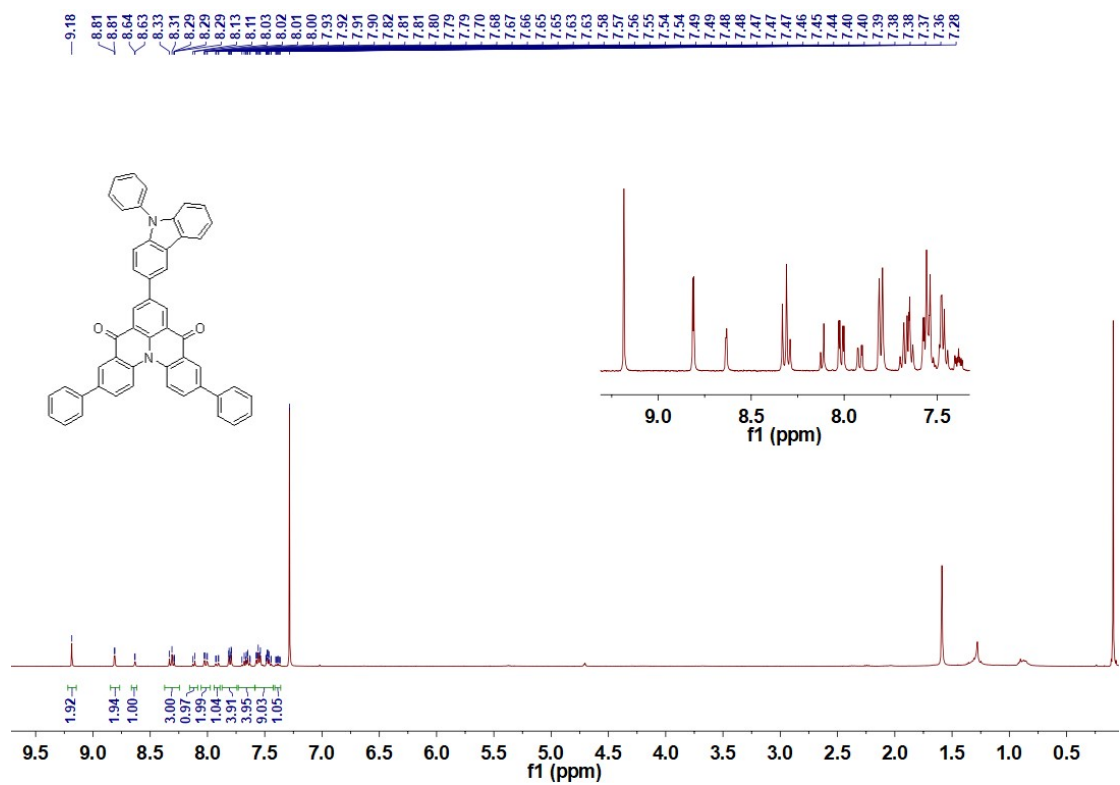

**Figure S11.**  $^1\text{H}$  NMR spectrum of QAOCz1.

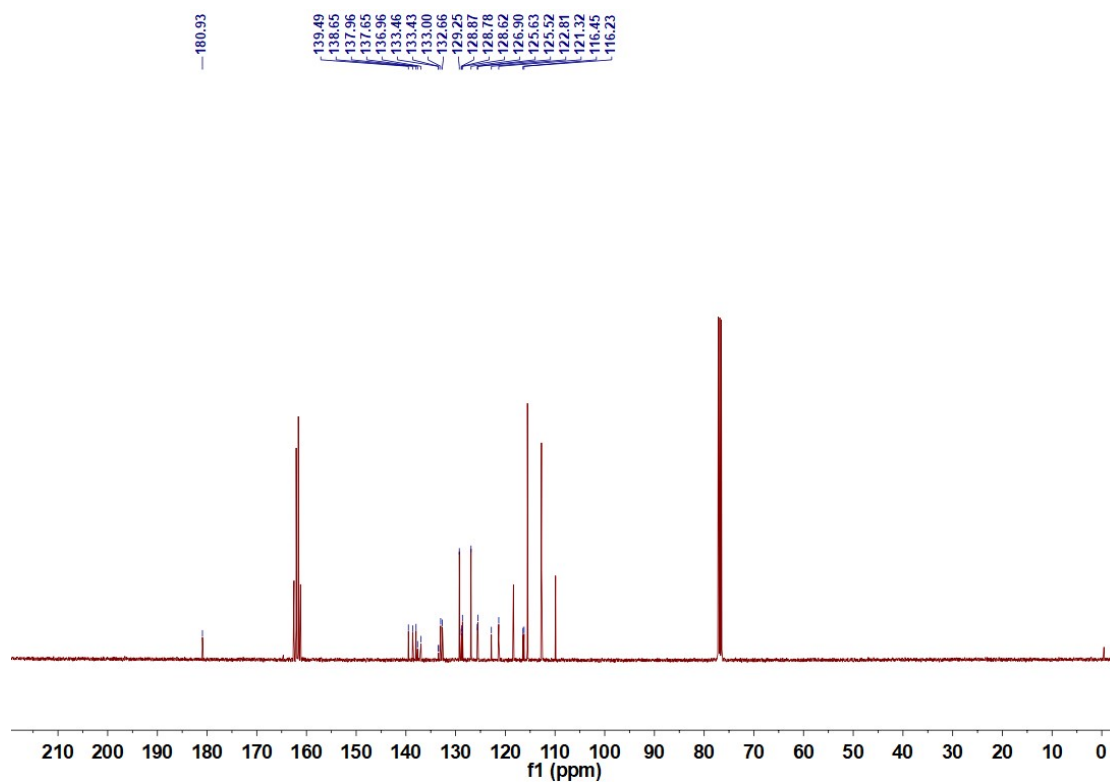

Figure S12.  $^{13}\text{C}$  NMR spectrum of QAOCz1.

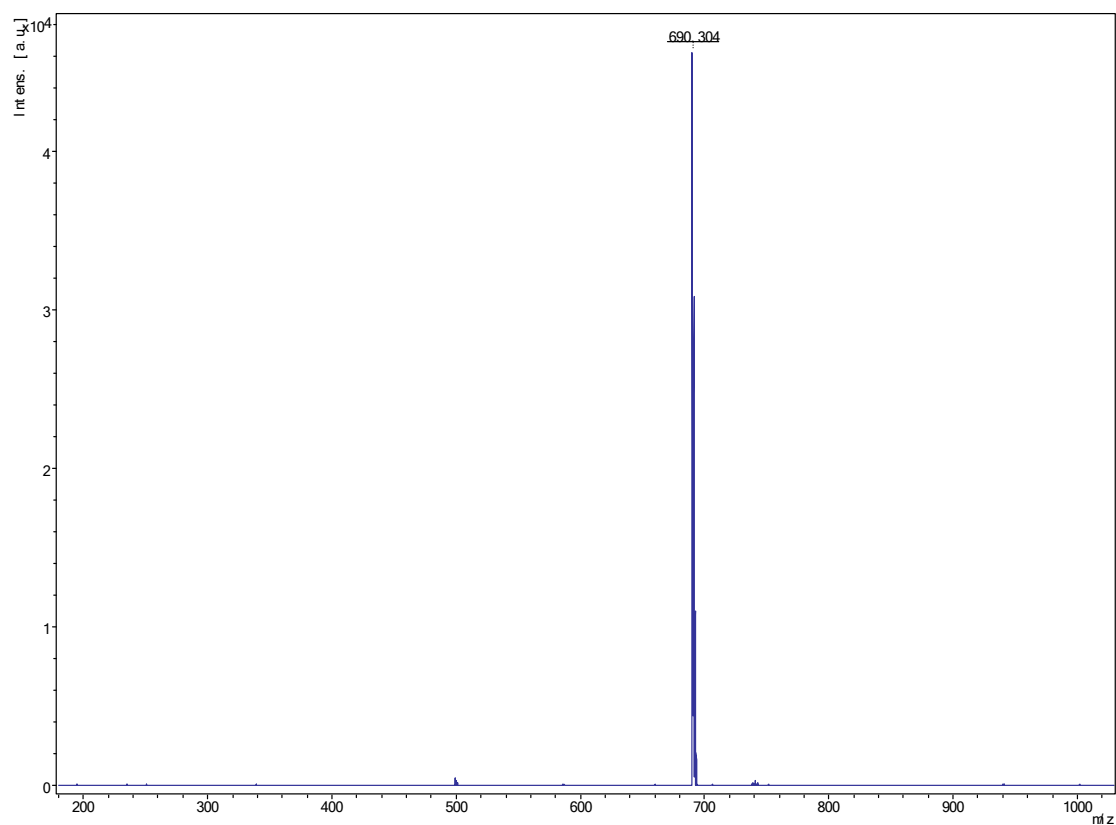

Figure S13. MALDI-TOF-MS spectrum of QAOCz1.

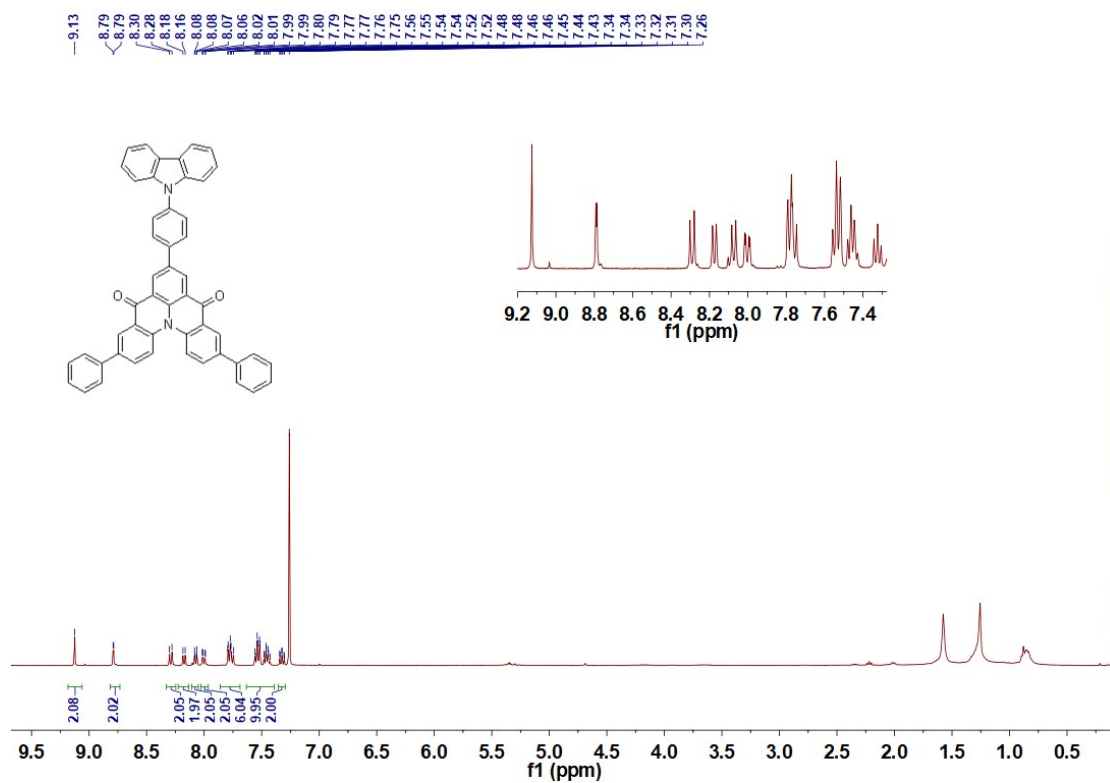

Figure S14. <sup>1</sup>H NMR spectrum of QAOCz2.

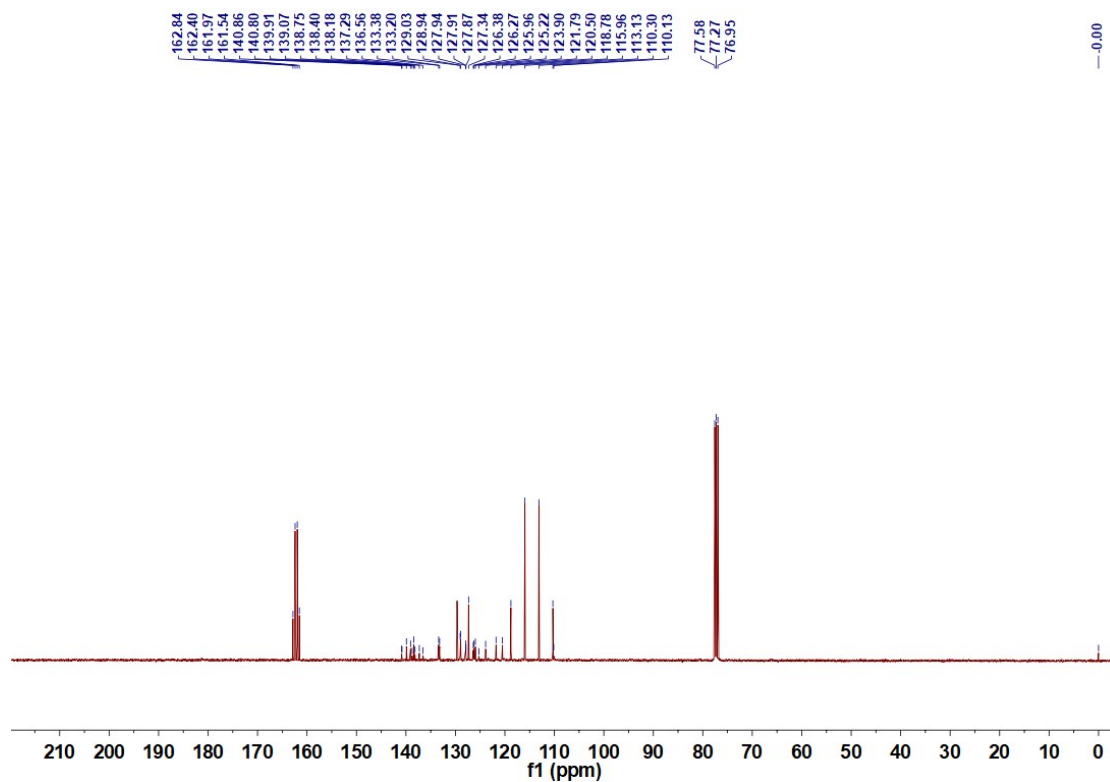

Figure S15. <sup>13</sup>C NMR spectrum of QAOCz2.



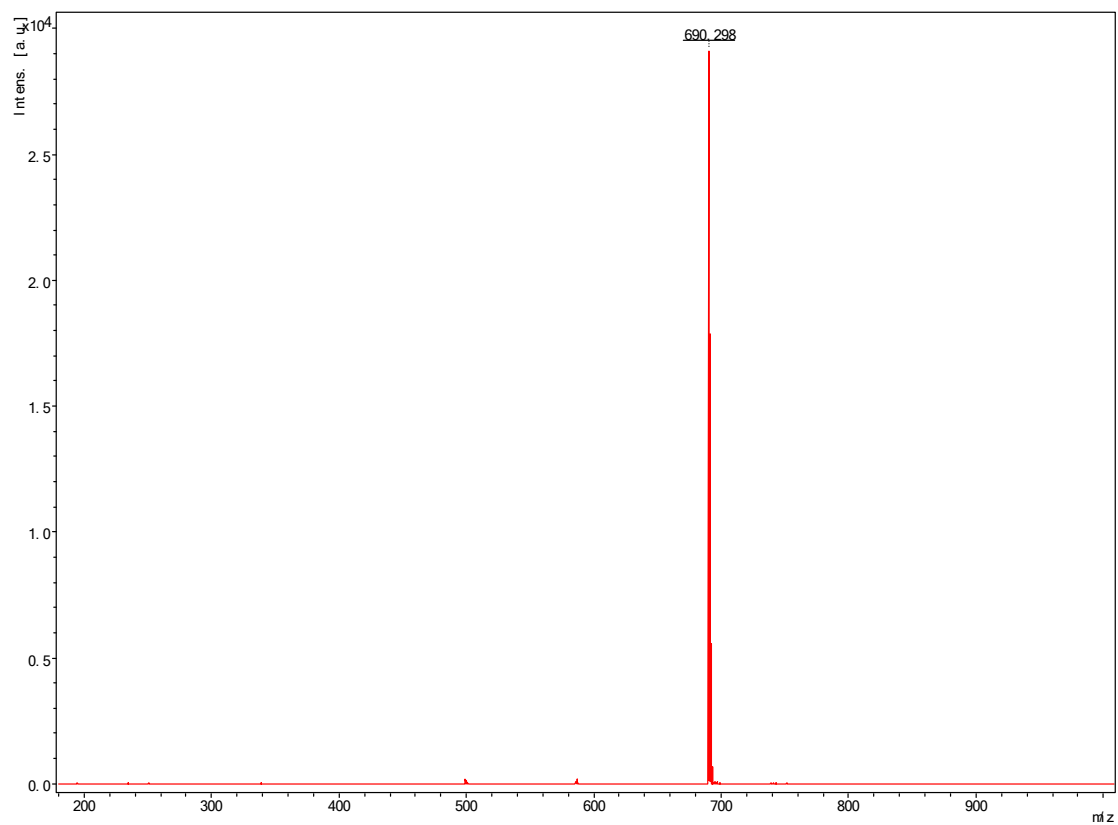

Figure S16. MALDI-TOF-MS spectrum of QAOCz2.

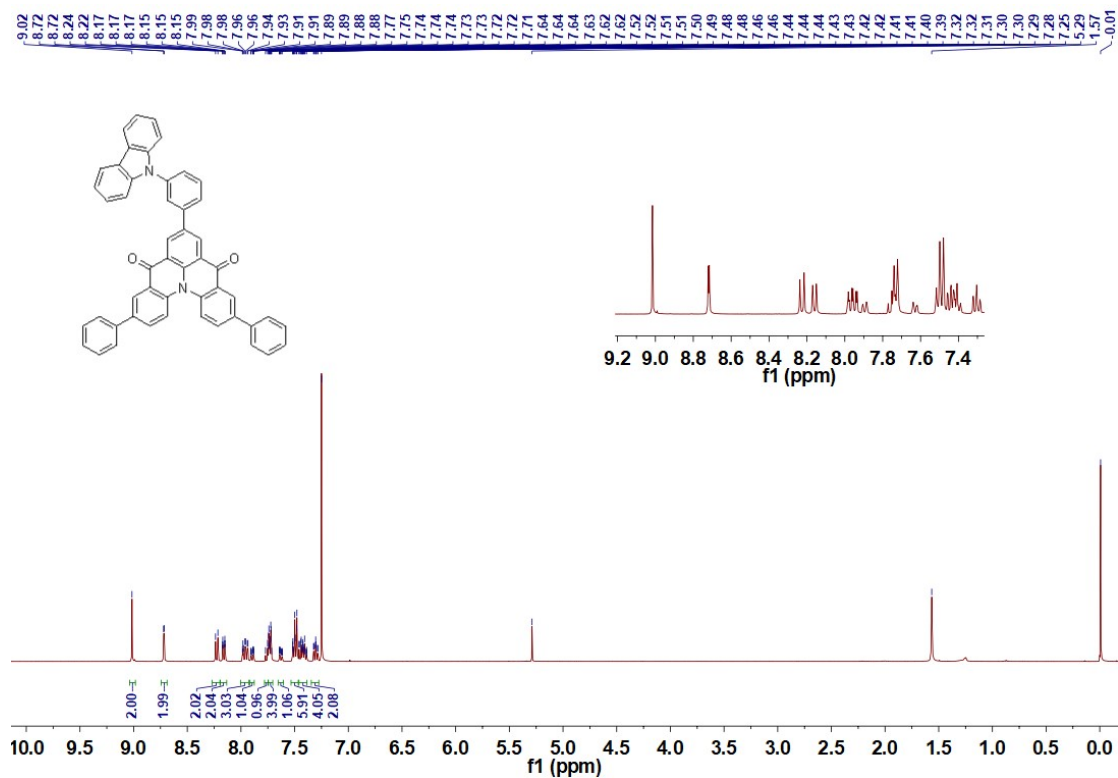

Figure S17. <sup>1</sup>H NMR spectrum of QAOCz3.

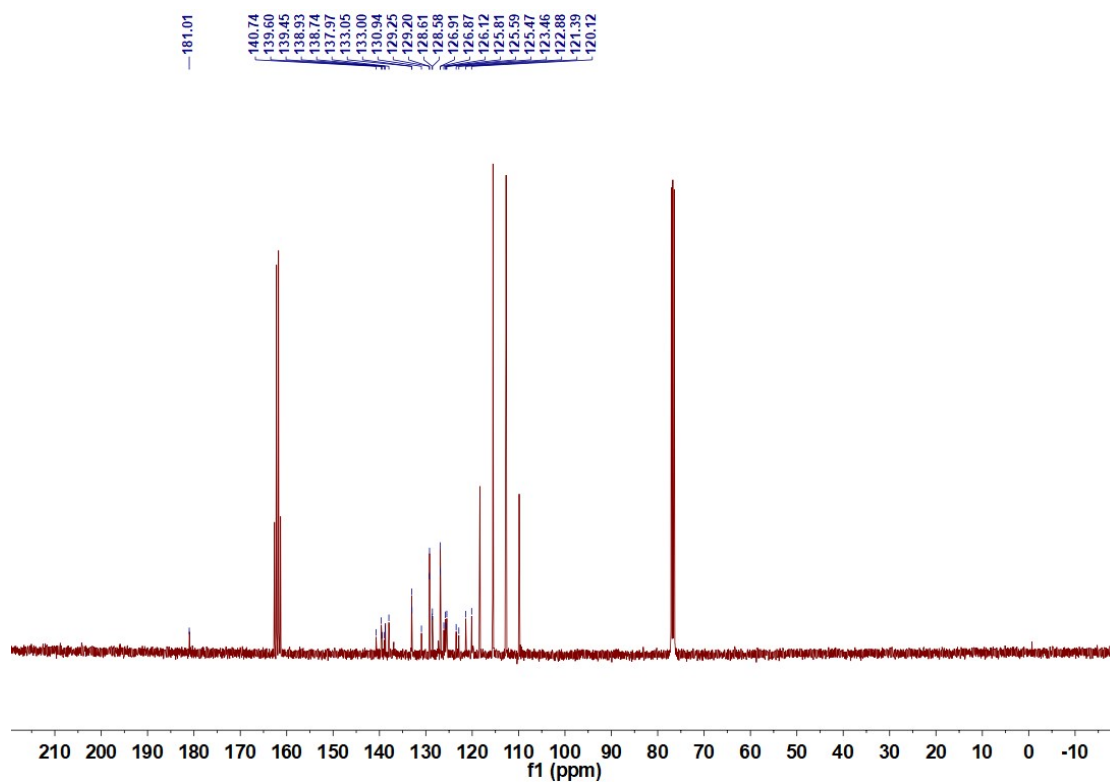

Figure S18.  $^{13}\text{C}$  NMR spectrum of QAOCz3.

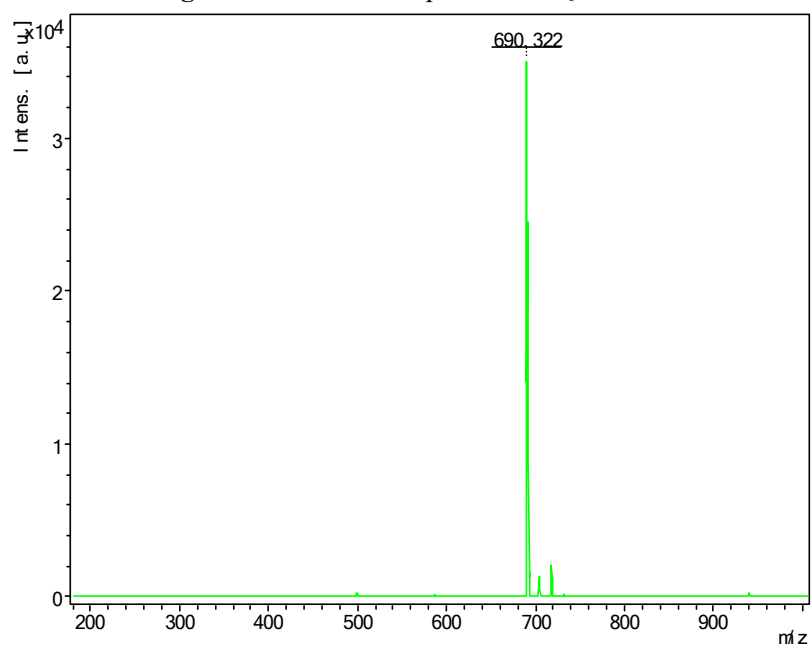

Figure S19. MALDI-TOF-MS spectrum of QAOCz3.

## 2.2 Photophysical properties

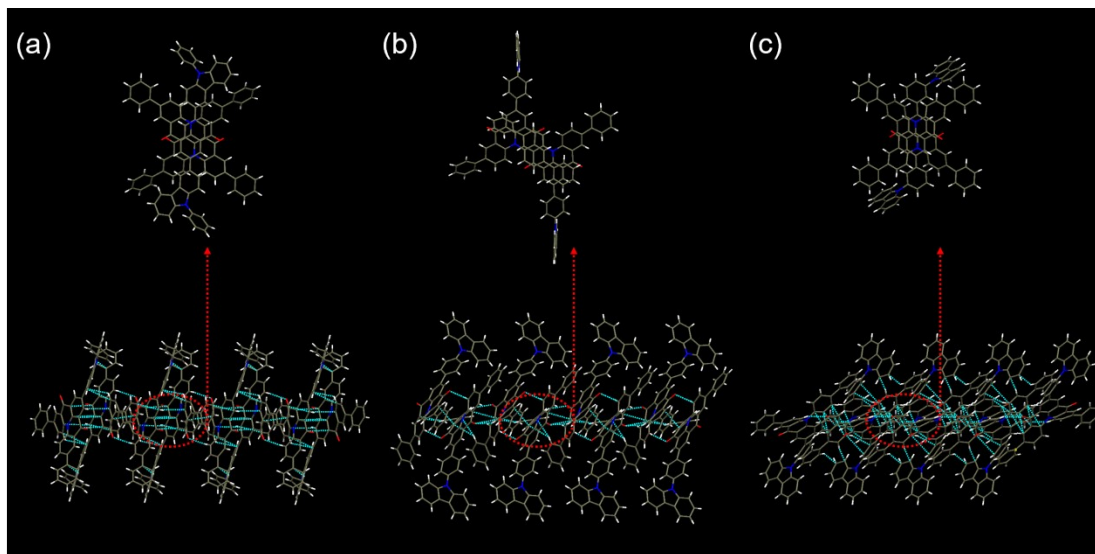

**Figure S20.** The packing mode of QAOCz1 (a), QAOCz2 (b), and QAOCz3 (c).

## 2.3 Photophysical properties

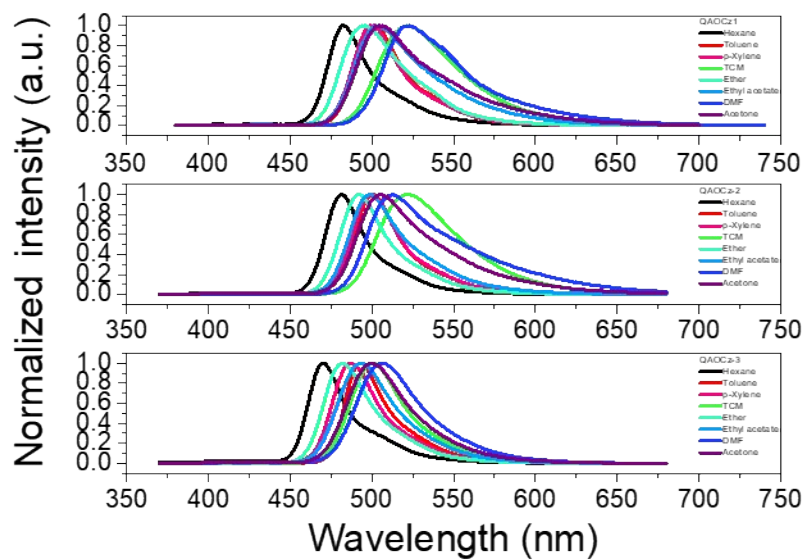

**Figure S21.** Solvatochromatic PL study for QAOCz1, QAOCz2, and QAOCz3.

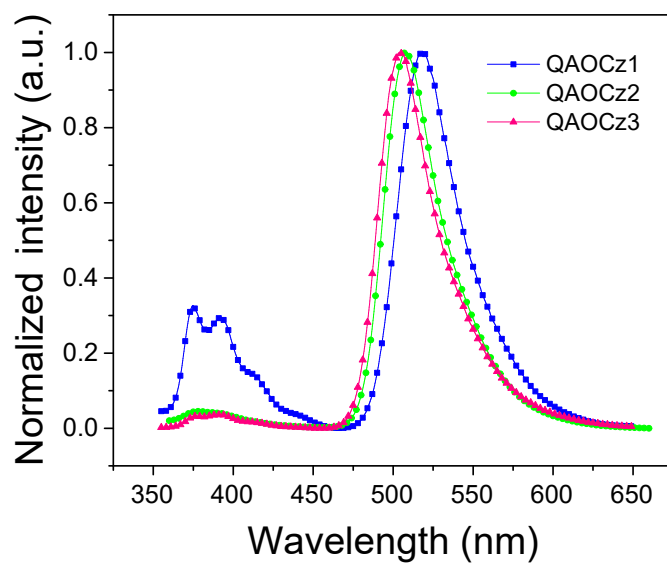

**Figure S22.** Emission spectra of QAOCz1, QAOCz2, and QAOCz3 in 5 wt% CBP at room temperature.

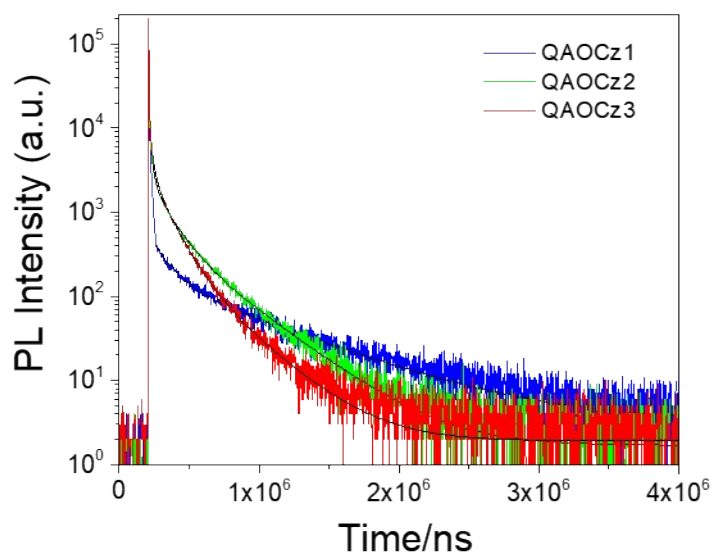

**Figure S23.** Transient PL decay spectrum of QAOCz1, QAOCz2 and QAOCz3 doped into CBP film (5 wt%) at room temperature.

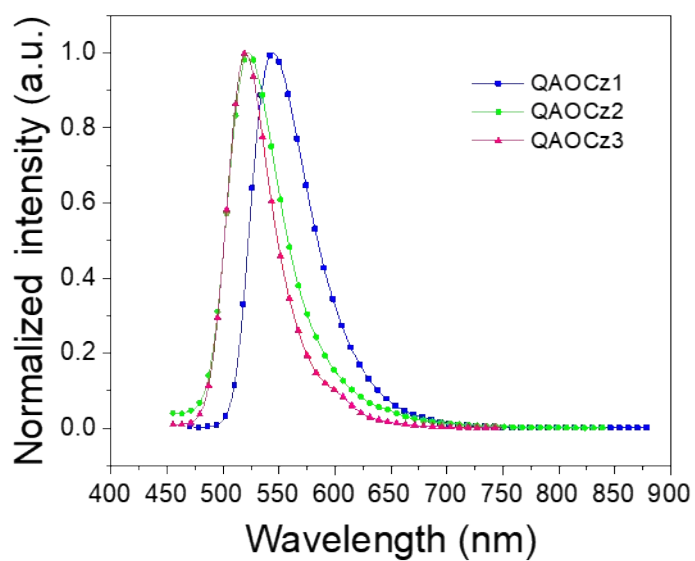

**Figure S24.** Emission spectra of QAOCz1, QAOCz2, and QAOCz3 in neat film at room temperature.

## 2.4 Thermal properties

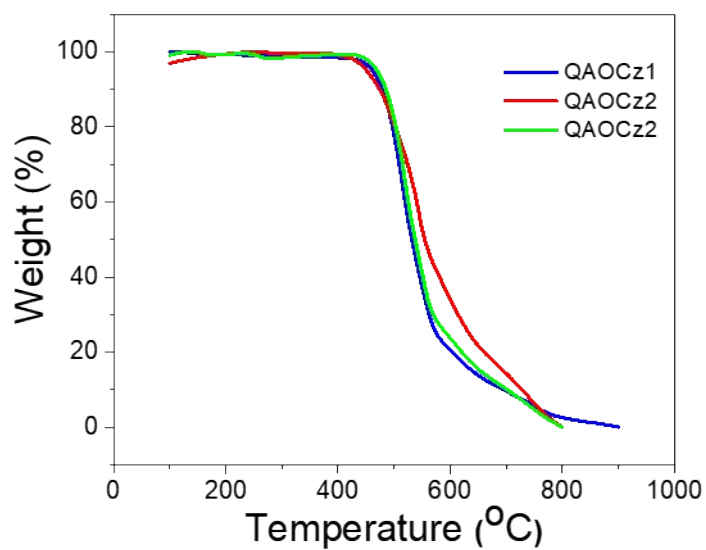

**Figure S25.** TGA curves of QAOCz1, QAOCz2, and QAOCz3.

## 2.5 Electrochemical properties

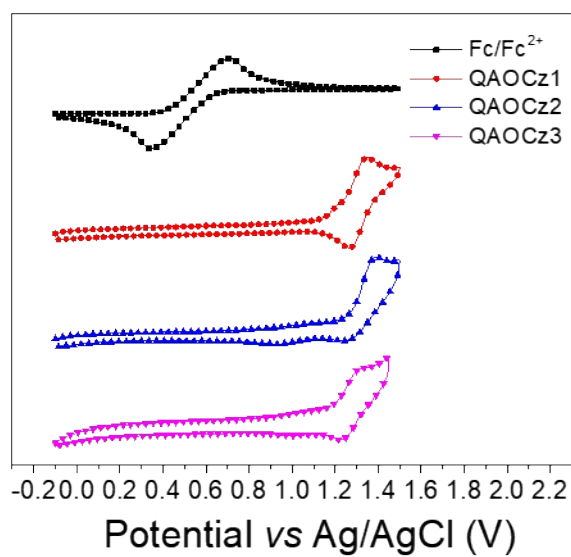

**Figure S26.** Cyclic voltammograms of QAOCz1, QAOCz2 and QAOCz3.

## 2.6 Device properties

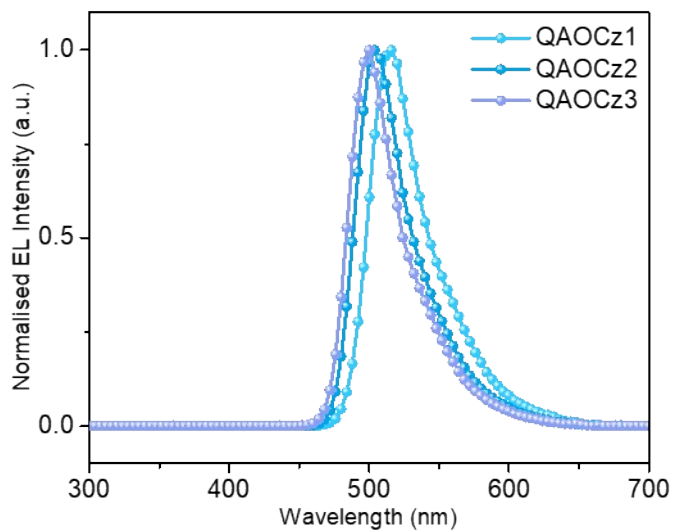

**Figure S27.** EL spectra of QAOCz1, QAOCz2 and QAOCz3 based devices at the current density of 5 mA/cm<sup>2</sup>

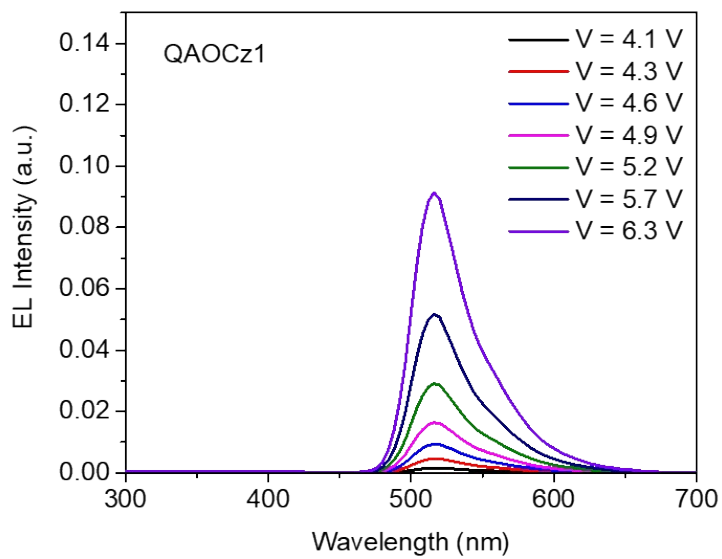

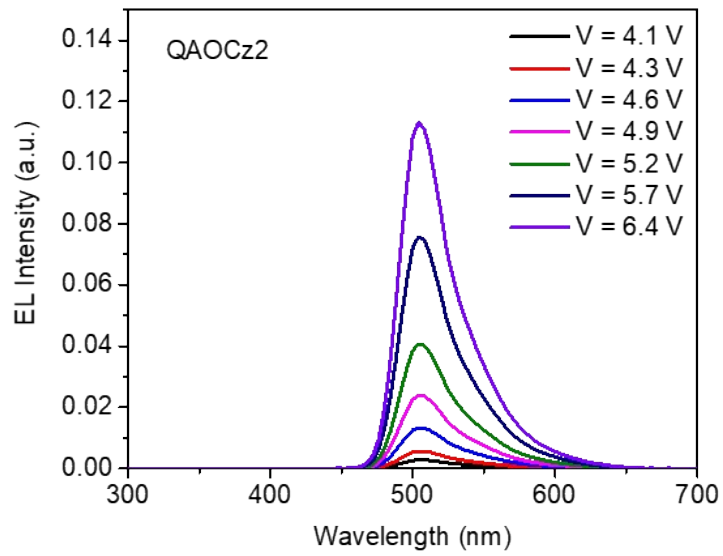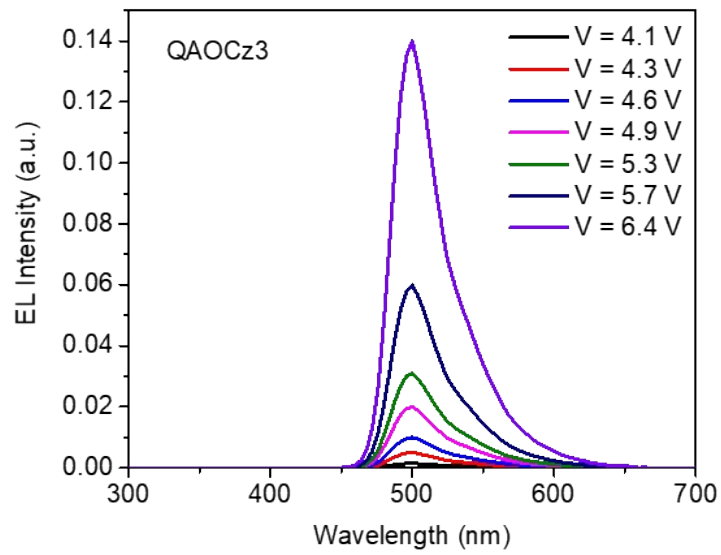

**Figure S28.** EL spectra of QAOCz1, QAOCz2 and QAOCz3 based devices at at different applied voltages.



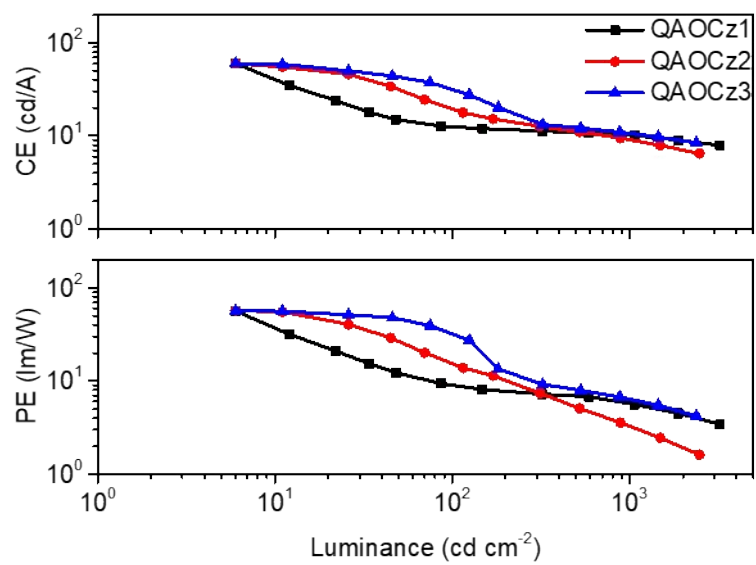

**Figure S29.** Power/current efficiency vs. luminance relationships of QAOCz1, QAOCz2 and QAOCz3 based devices.

### 3 Supplemental Tables

#### 3.1 Crystal data and structure refinement

**TableS1.** Single crystal X-ray diffraction data of QAOCz1 in CHCl<sub>3</sub> and THF.

| Compounds                                   | QAOCz1                                                        |
|---------------------------------------------|---------------------------------------------------------------|
| Empirical formula                           | C <sub>50</sub> H <sub>30</sub> N <sub>2</sub> O <sub>2</sub> |
| Formula weight                              | 690.76                                                        |
| Temperature/K                               | 170.15                                                        |
| Crystal system                              | monoclinic                                                    |
| Space group                                 | P21/c                                                         |
| a/Å                                         | 13.6522(19)                                                   |
| b/Å                                         | 9.9140(13)                                                    |
| c/Å                                         | 28.653(4)                                                     |
| α/°                                         | 90                                                            |
| β/°                                         | 98.009(5)                                                     |
| γ/°                                         | 90                                                            |
| Volume/Å <sup>3</sup>                       | 3840.3(9)                                                     |
| Z                                           | 4                                                             |
| ρ <sub>calc</sub> /cm <sup>3</sup>          | 1.195                                                         |
| μ/mm <sup>-1</sup>                          | 0.073                                                         |
| F(000)                                      | 1440.0                                                        |
| Crystal size/mm <sup>3</sup>                | 0.08 × 0.05 × 0.02                                            |
| Radiation                                   | MoKα (λ = 0.71073)                                            |
| 2θ range for data collection/°              | 4.352 to 50.018                                               |
| Index ranges                                | -16 ≤ h ≤ 16, -11 ≤ k ≤ 11, -34 ≤ l ≤ 30                      |
| Reflections collected                       | 25861                                                         |
| Independent reflections                     | 6741 [R <sub>int</sub> = 0.1479, R <sub>sigma</sub> = 0.1439] |
| Data/restraints/parameters                  | 6741/0/487                                                    |
| Goodness-of-fit on F <sup>2</sup>           | 0.937                                                         |
| Final R indexes [I >= 2σ (I)]               | R1 = 0.0676, wR2 = 0.1377                                     |
| Final R indexes [all data]                  | R1 = 0.1737, wR2 = 0.1626                                     |
| Largest diff. peak/hole / e Å <sup>-3</sup> | 0.34/-0.29                                                    |

**TableS2.** Single crystal X-ray diffraction data of QAOCz2 in CHCl<sub>3</sub> and THF.

| Compounds         | QAOCz2                                                        |
|-------------------|---------------------------------------------------------------|
| Empirical formula | C <sub>50</sub> H <sub>30</sub> N <sub>2</sub> O <sub>2</sub> |
| Formula weight    | 690.76                                                        |
| Temperature/K     | 153.0                                                         |
| Crystal system    | monoclinic                                                    |

|                                             |                                                                |
|---------------------------------------------|----------------------------------------------------------------|
| Space group                                 | P21/n                                                          |
| a/Å                                         | 9.7613(5)                                                      |
| b/Å                                         | 24.3715(13)                                                    |
| c/Å                                         | 17.4760(9)                                                     |
| $\alpha$ /°                                 | 90                                                             |
| $\beta$ /°                                  | 104.442(2)                                                     |
| $\gamma$ /°                                 | 90                                                             |
| Volume/Å <sup>3</sup>                       | 4026.1(4)                                                      |
| Z                                           | 4                                                              |
| $\rho_{\text{calc}}$ /g/cm <sup>3</sup>     | 1.140                                                          |
| $\mu$ /mm <sup>-1</sup>                     | 0.069                                                          |
| F(000)                                      | 1440.0                                                         |
| Crystal size/mm <sup>3</sup>                | 0.19 × 0.12 × 0.08                                             |
| Radiation                                   | MoK $\alpha$ ( $\lambda$ = 0.71073)                            |
| 2 $\Theta$ range for data collection/°      | 4.118 to 52.832                                                |
| Index ranges                                | -12 ≤ h ≤ 10, -30 ≤ k ≤ 24, -21 ≤ l ≤ 21                       |
| Reflections collected                       | 30446                                                          |
| Independent reflections                     | 8198 [ $R_{\text{int}}$ = 0.0981, $R_{\text{sigma}}$ = 0.1077] |
| Data/restraints/parameters                  | 8198/480/487                                                   |
| Goodness-of-fit on F <sup>2</sup>           | 1.029                                                          |
| Final R indexes [ $I \geq 2\sigma(I)$ ]     | R1 = 0.0829, wR2 = 0.2031                                      |
| Final R indexes [all data]                  | R1 = 0.1772, wR2 = 0.2607                                      |
| Largest diff. peak/hole / e Å <sup>-3</sup> | 0.33/-0.24                                                     |

**TableS3.** Single crystal X-ray diffraction data of QAOCz3 in CHCl<sub>3</sub> and THF.

| Compounds                               | QAOCz3                                                        |
|-----------------------------------------|---------------------------------------------------------------|
| Empirical formula                       | C <sub>50</sub> H <sub>30</sub> N <sub>2</sub> O <sub>2</sub> |
| Formula weight                          | 690.76                                                        |
| Temperature/K                           | 146.0                                                         |
| Crystal system                          | monoclinic                                                    |
| Space group                             | C2/c                                                          |
| a/Å                                     | 36.0644(14)                                                   |
| b/Å                                     | 18.9834(7)                                                    |
| c/Å                                     | 11.1339(4)                                                    |
| $\alpha$ /°                             | 90                                                            |
| $\beta$ /°                              | 103.7000(10)                                                  |
| $\gamma$ /°                             | 90                                                            |
| Volume/Å <sup>3</sup>                   | 7405.7(5)                                                     |
| Z                                       | 8                                                             |
| $\rho_{\text{calc}}$ /g/cm <sup>3</sup> | 1.239                                                         |
| $\mu$ /mm <sup>-1</sup>                 | 0.075                                                         |
| F(000)                                  | 2880.0                                                        |
| Crystal size/mm <sup>3</sup>            | 0.19 × 0.15 × 0.12                                            |

|                                                  |                                                               |
|--------------------------------------------------|---------------------------------------------------------------|
| Radiation                                        | MoK $\alpha$ ( $\lambda = 0.71073$ )                          |
| 2 $\Theta$ range for data collection/ $^{\circ}$ | 4.094 to 52.788                                               |
| Index ranges                                     | $-45 \leq h \leq 45, -23 \leq k \leq 23, -13 \leq l \leq 13$  |
| Reflections collected                            | 41225                                                         |
| Independent reflections                          | 7567 [ $R_{\text{int}} = 0.0496, R_{\text{sigma}} = 0.0360$ ] |
| Data/restraints/parameters                       | 7567/0/523                                                    |
| Goodness-of-fit on $F^2$                         | 1.020                                                         |
| Final R indexes [ $I \geq 2\sigma(I)$ ]          | $R1 = 0.0459, wR2 = 0.1122$                                   |
| Final R indexes [all data]                       | $R1 = 0.0712, wR2 = 0.1300$                                   |
| Largest diff. peak/hole / $e \text{ \AA}^{-3}$   | 0.19/-0.19                                                    |

### 3.2 DFT simulation

**TableS4.** Physical properties of QAOCz1, QAOCz2, and QAOCz3 from DFT simulation

| Compound | HOMO (eV) | LUMO (eV) | S <sub>1</sub> (eV) | T <sub>1</sub> (eV) | $E_g$ (eV) | $\Delta E_{ST}$ (eV) | $f$ (eV) |
|----------|-----------|-----------|---------------------|---------------------|------------|----------------------|----------|
| QAOCz1   | -5.21     | -2.20     | 2.60                | 2.21                | 3.01       | 0.39                 | 0.0535   |
| QAOCz2   | -5.25     | -2.37     | 2.54                | 2.38                | 2.88       | 0.26                 | 0.0143   |
| QAOCz3   | -5.23     | -2.38     | 2.47                | 2.31                | 2.85       | 0.16                 | 0.0018   |

### 3.3 Photophysical properties

**TableS5.** Physical properties of QAOCz1, QAOCz2, and QAOCz3 in films

| Compound | <sup>a</sup> $\lambda_{em}$ (nm) | <sup>a</sup> FWHM (nm) | <sup>b</sup> $\lambda_{em}$ (nm) | <sup>b</sup> FWHM (nm) | <sup>a</sup> PLQY (%) | $\tau_p$ (ns) | $T_d$ ( $\mu s$ ) |
|----------|----------------------------------|------------------------|----------------------------------|------------------------|-----------------------|---------------|-------------------|
| QAOCz1   | 501                              | 45                     | 544                              | 62                     | 86.1%                 | 2.63          | 116.7<br>3        |
| QAOCz2   | 500                              | 41                     | 525                              | 57                     | 86.8%                 | 5.51          | 16.37             |
| QAOCz3   | 495                              | 42                     | 519                              | 49                     | 98.9%                 | 5.55          | 26.45             |

<sup>a</sup> 5 wt % emitter in CBP; <sup>b</sup> in neat film.

### 3.4 Thermal and Electrochemical properties

**TableS6.** Electrochemical, thermal parameters and photophysical properties of QAOCz1, QAOCz2, and QAOCz3.

| $T_d$ | $T_g$ | <sup>a</sup> HOMO | <sup>c</sup> LUMO | <sup>b</sup> $E_g$ |
|-------|-------|-------------------|-------------------|--------------------|
|-------|-------|-------------------|-------------------|--------------------|

|        | (°C) | (°C) | (eV)  | (eV)  | (eV) |
|--------|------|------|-------|-------|------|
| QAOCz1 | 459  | /    | -5.47 | -3.02 | 2.47 |
| QAOCz2 | 450  | /    | -5.54 | -3.06 | 2.48 |
| QAOCz3 | 469  | /    | -5.47 | -2.96 | 2.51 |

<sup>a</sup> In DMF solution (in  $5 \times 10^{-3}$  M) using ferrocene as a reference; <sup>b</sup> determined from the  $\lambda$  of UV absorption spectra measured in toluene solution at room temperature; <sup>c</sup> determined from the value of HOMO and  $E_g$ .

**Table S7.** Color purity related parameters, FWHM and RSH of QAOCz1, QAOCz2, and QAOCz3 based devices.

|        | $\lambda_1$<br>(nm) | $\lambda_2$<br>(nm) | $\lambda_3$<br>(nm) | $\lambda_4$<br>(nm) | $\lambda_{\text{peak}}$<br>(nm) | FWHM<br>(nm) | RSH  |
|--------|---------------------|---------------------|---------------------|---------------------|---------------------------------|--------------|------|
| QAOCz1 | 497                 | 541                 | 478                 | 568                 | 516                             | 44           | 1.98 |
| QAOCz2 | 488                 | 531                 | 472                 | 558                 | 504                             | 43           | 1.96 |
| QAOCz3 | 483                 | 523                 | 466                 | 546                 | 500                             | 40           | 1.98 |

Computational geometry data

**Summary of geometry results for QAOCz1**

Calculation Method = RB3LYP

Basis Set = 6-31G(d)

Charge = 0

Spin = Singlet

E(RB3LYP) = -2183.44029488 a.u.

RMS Gradient Norm = 0.00000176 a.u.

Dipole Moment = 1.7948 Debye

Point Group = C1

|   |            |            |             |
|---|------------|------------|-------------|
| O | 6.49390000 | 8.64200000 | 2.59390000  |
| O | 4.65520000 | 3.96660000 | -2.46280000 |
| N | 6.76040000 | 7.27790000 | -1.25010000 |
| N | 1.34630000 | 2.69560000 | 5.59750000  |
| C | 5.99200000 | 6.56510000 | -0.32090000 |
| C | 6.01560000 | 6.65130000 | -5.39810000 |
| C | 7.76290000 | 8.15820000 | -0.75840000 |
| C | 6.84050000 | 8.05710000 | -3.58580000 |
| H | 7.22740000 | 8.87930000 | -3.30860000 |
| C | 5.22270000 | 5.45370000 | -0.71330000 |
| C | 5.20900000 | 5.01450000 | -2.11010000 |
| C | 6.50200000 | 7.08550000 | -2.62540000 |
| C | 4.04720000 | 4.31460000 | 3.89600000  |
| H | 4.89050000 | 4.67550000 | 4.14540000  |
| C | 6.61510000 | 7.82510000 | -4.92390000 |
| H | 6.87710000 | 8.48800000 | -5.55170000 |
| C | 3.62130000 | 4.39790000 | 2.57550000  |
| C | 4.47000000 | 4.74980000 | 0.23070000  |

|   |             |             |             |
|---|-------------|-------------|-------------|
| H | 3.96180000  | 3.99880000  | -0.05050000 |
| C | 5.81680000  | 5.93850000  | -3.07310000 |
| C | 5.95720000  | 6.95170000  | 1.03310000  |
| C | 5.60710000  | 5.73430000  | -4.43510000 |
| H | 5.17000000  | 4.93910000  | -4.71650000 |
| C | 3.34840000  | 3.51250000  | 6.27170000  |
| C | 8.58970000  | 9.60860000  | 1.00160000  |
| H | 8.50170000  | 9.95480000  | 1.88190000  |
| C | 3.24380000  | 3.70590000  | 4.85130000  |
| C | 4.44700000  | 5.11860000  | 1.56820000  |
| C | 7.67520000  | 8.64010000  | 0.55360000  |
| C | 0.02170000  | 2.16920000  | 5.63870000  |
| C | 5.19420000  | 6.22600000  | 1.93450000  |
| H | 5.18460000  | 6.49950000  | 2.84420000  |
| C | 1.92610000  | 2.59950000  | 8.04560000  |
| H | 1.11120000  | 2.20140000  | 8.32890000  |
| C | 8.87430000  | 8.51220000  | -1.52620000 |
| H | 9.01230000  | 8.11440000  | -2.37800000 |
| C | 2.15660000  | 2.90980000  | 6.70810000  |
| C | 1.99650000  | 3.18140000  | 4.46910000  |
| C | 6.68220000  | 8.13540000  | 1.47850000  |
| C | 5.79430000  | 6.41730000  | -6.84260000 |
| C | 4.34920000  | 3.77720000  | 7.21200000  |
| H | 5.17140000  | 4.16550000  | 6.93770000  |
| C | 9.61340000  | 10.07060000 | 0.19780000  |
| C | 5.53120000  | 7.48310000  | -7.69940000 |
| H | 5.48070000  | 8.36580000  | -7.35230000 |
| C | 9.77160000  | 9.44010000  | -1.04360000 |
| H | 10.52870000 | 9.66050000  | -1.57380000 |
| C | 2.94410000  | 2.89690000  | 8.95070000  |
| H | 2.81900000  | 2.70310000  | 9.87220000  |
| C | 2.38740000  | 3.82280000  | 2.20520000  |
| H | 2.11320000  | 3.85700000  | 1.29610000  |
| C | 4.13610000  | 3.47190000  | 8.53280000  |
| H | 4.81540000  | 3.65760000  | 9.17070000  |
| C | 1.56860000  | 3.21110000  | 3.13440000  |
| H | 0.74060000  | 2.82240000  | 2.87700000  |
| C | 10.50200000 | 11.19790000 | 0.62560000  |
| C | 5.86670000  | 5.13740000  | -7.38620000 |
| H | 6.02760000  | 4.39510000  | -6.81590000 |
| C | 5.34110000  | 7.26500000  | -9.05510000 |
| H | 5.14170000  | 7.99640000  | -9.62720000 |
| C | 10.64350000 | 11.54090000 | 1.95830000  |
| H | 10.20900000 | 11.01930000 | 2.62370000  |

|   |             |             |              |
|---|-------------|-------------|--------------|
| C | 5.70580000  | 4.93120000  | -8.74610000  |
| H | 5.77800000  | 4.05450000  | -9.10530000  |
| C | 11.13160000 | 11.97910000 | -0.31750000  |
| H | 11.02970000 | 11.76670000 | -1.23770000  |
| C | -0.26530000 | 0.91700000  | 5.16540000   |
| H | 0.42540000  | 0.38060000  | 4.79430000   |
| C | 5.44190000  | 5.99700000  | -9.57810000  |
| H | 5.32870000  | 5.85620000  | -10.51080000 |
| C | -0.99060000 | 2.94740000  | 6.17660000   |
| H | -0.80540000 | 3.82390000  | 6.49360000   |
| C | 11.91990000 | 13.08150000 | 0.04710000   |
| H | 12.36980000 | 13.59590000 | -0.61270000  |
| C | 12.02610000 | 13.40270000 | 1.38830000   |
| H | 12.53260000 | 14.16280000 | 1.65080000   |
| C | 11.41170000 | 12.63740000 | 2.33970000   |
| H | 11.50810000 | 12.85380000 | 3.25980000   |
| C | -2.56780000 | 1.18370000  | 5.77230000   |
| H | -3.45410000 | 0.84390000  | 5.82050000   |
| C | -2.27690000 | 2.43190000  | 6.24640000   |
| H | -2.96930000 | 2.95680000  | 6.63120000   |
| C | -1.56270000 | 0.42830000  | 5.22640000   |
| H | -1.75540000 | -0.43790000 | 4.88650000   |

### Summary of geometry results for QAOCz2

Calculation Method = RB3LYP

Basis Set = 6-31G(d)

Charge = 0

Spin = Singlet

E(RB3LYP) = -2183.43970850 a.u.

RMS Gradient Norm = 0.00000191 a.u.

Dipole Moment = 5.6537 Debye

Point Group = C1

|   |             |             |            |
|---|-------------|-------------|------------|
| O | 11.78520000 | 6.84940000  | 1.11500000 |
| O | 13.26240000 | 7.01490000  | 8.09220000 |
| N | 12.47380000 | 8.95090000  | 4.55730000 |
| N | 11.53290000 | -0.91040000 | 5.25250000 |
| C | 13.06750000 | 9.66270000  | 5.63390000 |
| C | 11.81210000 | 9.59990000  | 3.48140000 |
| C | 12.44990000 | 7.55630000  | 4.60360000 |
| C | 13.75450000 | 9.76490000  | 7.95520000 |
| H | 13.86510000 | 9.32290000  | 8.78890000 |
| C | 13.28620000 | 9.03270000  | 6.86280000 |
| C | 14.06320000 | 11.11100000 | 7.86810000 |
| C | 12.15270000 | 6.79420000  | 3.45560000 |

|   |             |             |             |
|---|-------------|-------------|-------------|
| C | 13.52090000 | 10.98320000 | 5.49150000  |
| H | 13.49820000 | 11.40120000 | 4.63860000  |
| C | 12.72790000 | 6.86690000  | 5.79930000  |
| C | 11.29780000 | 10.89910000 | 3.60110000  |
| H | 11.39600000 | 11.37210000 | 4.41910000  |
| C | 13.08380000 | 7.59010000  | 7.01860000  |
| C | 11.86310000 | 7.46160000  | 2.17890000  |
| C | 10.45840000 | 10.83780000 | 1.31190000  |
| C | 11.57380000 | 8.90170000  | 2.29000000  |
| C | 10.92190000 | 9.53590000  | 1.22440000  |
| H | 10.79390000 | 9.05680000  | 0.41420000  |
| C | 12.10570000 | 5.40400000  | 3.53310000  |
| H | 11.90960000 | 4.90680000  | 2.74770000  |
| C | 13.99840000 | 11.67610000 | 6.58030000  |
| H | 14.29570000 | 12.57020000 | 6.45830000  |
| C | 12.65440000 | 5.48260000  | 5.84040000  |
| H | 12.82740000 | 5.04040000  | 6.66320000  |
| C | 12.33740000 | 4.71780000  | 4.72470000  |
| C | 9.73880000  | 11.48320000 | 0.18490000  |
| C | 10.65130000 | 11.49330000 | 2.54010000  |
| H | 10.32340000 | 12.37920000 | 2.64220000  |
| C | 8.68430000  | 12.36770000 | 0.41430000  |
| H | 8.42890000  | 12.57500000 | 1.30550000  |
| C | 14.42680000 | 11.91130000 | 9.07060000  |
| C | 10.08370000 | 11.20150000 | -1.13810000 |
| H | 10.79730000 | 10.59960000 | -1.31430000 |
| C | 10.32830000 | -1.47410000 | 5.66090000  |
| C | 10.43340000 | -2.87900000 | 5.58510000  |
| C | 11.75890000 | -3.16970000 | 5.10970000  |
| C | 11.79680000 | 0.48520000  | 5.10630000  |
| C | 12.21550000 | 3.23860000  | 4.82970000  |
| C | 9.16990000  | -0.84340000 | 6.09880000  |
| H | 9.10650000  | 0.10350000  | 6.14020000  |
| C | 9.33530000  | -3.66760000 | 5.94560000  |
| H | 9.38180000  | -4.61470000 | 5.88830000  |
| C | 14.75590000 | 11.29610000 | 10.27680000 |
| H | 14.79640000 | 10.34780000 | 10.31560000 |
| C | 8.00490000  | 12.94780000 | -0.64970000 |
| H | 7.28790000  | 13.54770000 | -0.48080000 |
| C | 12.44940000 | -4.35500000 | 4.83030000  |
| H | 12.03460000 | -5.19910000 | 4.96410000  |
| C | 9.40720000  | 11.78130000 | -2.20050000 |
| H | 9.65650000  | 11.57850000 | -3.09450000 |
| C | 12.40930000 | -1.93480000 | 4.90460000  |



|   |             |             |             |
|---|-------------|-------------|-------------|
| C | 8.36450000  | 12.65870000 | -1.94880000 |
| H | 7.89730000  | 13.06110000 | -2.67160000 |
| C | 15.02520000 | 12.02660000 | 11.41780000 |
| H | 15.24360000 | 11.57880000 | 12.22680000 |
| C | 14.38280000 | 13.29690000 | 9.05440000  |
| H | 14.16280000 | 13.75110000 | 8.24950000  |
| C | 14.97870000 | 13.39350000 | 11.38540000 |
| H | 15.16540000 | 13.89920000 | 12.16760000 |
| C | 13.74220000 | -4.27560000 | 4.35760000  |
| H | 14.21530000 | -5.07420000 | 4.15520000  |
| C | 8.18520000  | -3.04910000 | 6.38520000  |
| H | 7.43380000  | -3.57570000 | 6.63170000  |
| C | 8.11010000  | -1.65650000 | 6.47260000  |
| H | 7.31220000  | -1.25580000 | 6.79690000  |
| C | 13.71060000 | -1.85180000 | 4.43550000  |
| H | 14.13410000 | -1.01230000 | 4.30080000  |
| C | 14.36830000 | -3.03960000 | 4.17110000  |
| H | 15.26410000 | -3.01500000 | 3.85570000  |
| C | 14.65760000 | 14.02870000 | 10.20540000 |
| H | 14.62330000 | 14.97780000 | 10.17740000 |
| C | 11.65460000 | 1.29470000  | 6.23280000  |
| H | 11.42270000 | 0.91240000  | 7.07070000  |
| C | 12.12310000 | 1.05470000  | 3.87900000  |
| H | 12.19960000 | 0.50610000  | 3.10720000  |
| C | 12.33670000 | 2.42110000  | 3.78060000  |
| H | 12.57790000 | 2.78840000  | 2.93780000  |
| C | 11.85330000 | 2.65710000  | 6.12030000  |
| H | 11.75450000 | 3.21610000  | 6.88180000  |

### Summary of geometry results for QAOCz3

Calculation Method = RB3LYP

Basis Set = 6-31G(d)

Charge = 0

Spin = Singlet

E(RB3LYP) = -2183.43929311 a.u.

RMS Gradient Norm = 0.00000229 a.u.

Dipole Moment = 5.1557 Debye

Point Group = C1

|   |            |             |             |
|---|------------|-------------|-------------|
| O | 1.50290000 | 15.28320000 | 8.22290000  |
| O | 6.40810000 | 10.32520000 | 6.64780000  |
| N | 4.95240000 | 13.25080000 | 9.12080000  |
| C | 3.58160000 | 17.90210000 | 12.16650000 |
| C | 3.47130000 | 15.14890000 | 9.54930000  |
| C | 3.13790000 | 16.27410000 | 10.32380000 |

|   |             |             |             |
|---|-------------|-------------|-------------|
| H | 2.30450000  | 16.70520000 | 10.17530000 |
| C | 4.29120000  | 12.98820000 | 7.91510000  |
| C | 3.98500000  | 16.77100000 | 11.29320000 |
| C | 2.59850000  | 14.75540000 | 8.42760000  |
| C | 5.89250000  | 11.13410000 | 7.43220000  |
| C | 4.66520000  | 14.47250000 | 9.80010000  |
| C | 3.16440000  | 13.73700000 | 7.54030000  |
| C | 4.74640000  | 11.96790000 | 7.07350000  |
| C | 2.51610000  | 13.44440000 | 6.33160000  |
| H | 1.74840000  | 13.94850000 | 6.08850000  |
| N | -0.13100000 | 13.55400000 | 1.75120000  |
| C | 6.14810000  | 12.21640000 | 11.00900000 |
| H | 5.73420000  | 12.82140000 | 11.61330000 |
| C | 5.59210000  | 15.05330000 | 10.67860000 |
| H | 6.45760000  | 14.67300000 | 10.77240000 |
| C | 6.34560000  | 11.27600000 | 8.82790000  |
| C | 5.25390000  | 16.16710000 | 11.40200000 |
| H | 5.89400000  | 16.54350000 | 11.99460000 |
| C | 5.83070000  | 12.27520000 | 9.65210000  |
| C | 4.08310000  | 11.71850000 | 5.87080000  |
| H | 4.41030000  | 11.03180000 | 5.30170000  |
| C | 7.04770000  | 11.29900000 | 11.48290000 |
| H | 7.24160000  | 11.28390000 | 12.41280000 |
| C | 2.96070000  | 12.43830000 | 5.47480000  |
| C | 4.12880000  | 18.04120000 | 13.44520000 |
| H | 4.77000000  | 17.41080000 | 13.75180000 |
| C | 7.27760000  | 10.36060000 | 9.32290000  |
| H | 7.63730000  | 9.70490000  | 8.73710000  |
| C | 7.69100000  | 10.38300000 | 10.64260000 |
| C | 2.65540000  | 18.85210000 | 11.75820000 |
| H | 2.27190000  | 18.78530000 | 10.89170000 |
| C | 2.22710000  | 12.08040000 | 4.23300000  |
| C | 1.46830000  | 13.02100000 | 3.52960000  |
| H | 1.46860000  | 13.93190000 | 3.79920000  |
| C | 3.74620000  | 19.09230000 | 14.27620000 |
| H | 4.12600000  | 19.16970000 | 15.14360000 |
| C | 2.82660000  | 20.01490000 | 13.85200000 |
| H | 2.56730000  | 20.73020000 | 14.42080000 |
| C | 2.27930000  | 19.89450000 | 12.58680000 |
| H | 1.64170000  | 20.53100000 | 12.28550000 |
| C | 2.19950000  | 10.76020000 | 3.79740000  |
| H | 2.70800000  | 10.10810000 | 4.26510000  |
| C | 8.74020000  | 9.47310000  | 11.16960000 |
| C | 0.71000000  | 12.61560000 | 2.42900000  |

|   |             |             |             |
|---|-------------|-------------|-------------|
| C | 1.45300000  | 10.37210000 | 2.70380000  |
| H | 1.45650000  | 9.46410000  | 2.42470000  |
| C | -0.89620000 | 15.36420000 | 0.61750000  |
| C | 0.69850000  | 11.30570000 | 2.01250000  |
| H | 0.18000000  | 11.04420000 | 1.26060000  |
| C | -1.54260000 | 13.39110000 | 1.55140000  |
| C | 0.28760000  | 14.75030000 | 1.17530000  |
| C | 0.51730000  | 17.10560000 | -0.17470000 |
| H | 0.62610000  | 17.92560000 | -0.64190000 |
| C | 1.53310000  | 15.26570000 | 1.06730000  |
| H | 2.28810000  | 14.83160000 | 1.44680000  |
| C | 9.44460000  | 9.78490000  | 12.28740000 |
| H | 9.24880000  | 10.59100000 | 12.75050000 |
| C | -2.02200000 | 14.50450000 | 0.89290000  |
| C | -3.39210000 | 14.61050000 | 0.55040000  |
| H | -3.73930000 | 15.35800000 | 0.07800000  |
| C | -0.74640000 | 16.57930000 | -0.05200000 |
| H | -1.49930000 | 17.03160000 | -0.41400000 |
| C | 1.65300000  | 16.48110000 | 0.36210000  |
| H | 2.50810000  | 16.87930000 | 0.24980000  |
| C | -2.36820000 | 12.35310000 | 1.93350000  |
| H | -2.03030000 | 11.58980000 | 2.38710000  |
| C | 9.02160000  | 8.26580000  | 10.50580000 |
| H | 8.53860000  | 8.01610000  | 9.72680000  |
| C | 10.44780000 | 8.94870000  | 12.76970000 |
| H | 10.93260000 | 9.19650000  | 13.54820000 |
| C | 10.73800000 | 7.79150000  | 12.14360000 |
| H | 11.42350000 | 7.22210000  | 12.47280000 |
| C | -4.19030000 | 13.55610000 | 0.94800000  |
| H | -5.11620000 | 13.58850000 | 0.73790000  |
| C | 10.02010000 | 7.44770000  | 11.01340000 |
| H | 10.21580000 | 6.62920000  | 10.57260000 |
| C | -3.72250000 | 12.47790000 | 1.62180000  |
| H | -4.32720000 | 11.79480000 | 1.88670000  |
